# Supplementary material
Source: ML conference proceedings conference paper supplement (https://openreview.net/forum?id=gdVcFOvxT3)
Supplement: supplementary_material [file attachment]

---

# Finding Safe Zones of Markov Decision Processes Policies

---

Anonymous Author(s)

Affiliation

Address

email

## Abstract

1        Given a policy of a Markov Decision Process, we define a `SAFEZONE` as a subset  
2        of states, such that most of the policy’s trajectories are confined to this subset.  
3        The quality of a `SAFEZONE` is parameterized by the number of states and the  
4        escape probability, i.e., the probability that a random trajectory will leave the  
5        subset. `SAFEZONES` are especially interesting when they have a small number  
6        of states and low escape probability. We study the complexity of finding optimal  
7        `SAFEZONES`, and show that in general, the problem is computationally hard. Our  
8        main result is a bi-criteria approximation learning algorithm with a factor of almost  
9        2 approximation for both the escape probability and `SAFEZONE` size, using a  
10       polynomial size sample complexity.

## 11    1 Introduction

12    Most research in reinforcement learning (RL) deals with learning an optimal policy for some Markov  
13    Decision Process (MDP). One notable exception to that is *Safe RL* which addresses the concept  
14    of safety. Traditional Safe RL focuses on finding the best policy that meets safety requirements,  
15    typically by either adjusting the objective to include the safety requirements and then optimizing for  
16    it, or incorporating additional safety constraints to the exploration. *Anomaly Detection* is the problem  
17    of identifying patterns in data that are unexpected, i.e., anomalies (see, e.g., Chandola et al. (2009)  
18    for survey). This paper introduces the `SAFEZONE` problem, which addresses the safety of a specific  
19    Markov decision process (MDP) policy by detecting anomalous events rather than finding a policy  
20    that satisfies some pre-defined safety constraints.

21    Consider a finite horizon MDP and a policy (a mapping from states to actions). The policy induces a  
22    Markov Chain (MC) on the MDP. Given a subset of states, a trajectory *escapes it* if at least one of  
23    its states is not in the subset. The *escape probability* of a subset is the probability that a randomly  
24    sampled trajectory will escape it. A `SAFEZONE` is a subset of states whose quality is measured by (1)  
25    its escape probability and (2) its size. If a `SAFEZONE` has low escape probability, we consider it *safe*  
26    (hence escaping is the anomaly). We emphasize that safety is policy-dependent and that different  
27    policies could have different `SAFEZONES`.

28    Trivial solutions for `SAFEZONE` include the entire states set (minimal escape probability of 0,  
29    maximal size), and the empty set (minimal size, maximal escape probability of 1). The goal is to  
30    find a `SAFEZONE` with a good balance: a relatively small size but still safe enough (small escape  
31    probability). More precisely, given an upper bound over the escape probability,  $\rho > 0$ , the goal of the  
32    learner is to find the smallest `SAFEZONE` with escape probability at most  $\rho$  using trajectory sampling.  
33    We address an unknown environment, by which we mean no prior knowledge of the transition  
34    function or the policy used. The learner is only given access to random trajectories generated by the  
35    induced Markov chain. For many applications, if a small `SAFEZONE` exists, it is useful to find it.

One such example is designing a policy for a smaller state space that performs well in most cases but is undefined for some states, or formally, imitation learning with compact policy representation Abel et al. (2018); Dong et al. (2019). Suppose a company would like to automatically generate a ‘lite’ edition of a software or an app (e.g., Microsoft Office Lite, Facebook Lite) that contains only part of the system’s states, finding a SAFEZONE makes a lot of sense— capturing popular users’ trajectories. If instead of finding SAFEZONE, one were to simply take the 90% most popular states of users using Office, they might not include the state that allows for the precious option of saving, which emphasizes the importance of the problem.

Another motivation for the problem is autonomous vehicles and specifically infrastructure design for them. Even though a lot of the progress in the field of autonomous driving is credited to sensors installed on the vehicles, relying solely on the vehicles’ sensors has its limitations (e.g., Yang et al. (2020)). In extreme weather, a vehicle might unintentionally deviate from the current lane and the vehicle sensors might not trigger a response in time. Vehicular-to-Infrastructure (V2I) is a type of communication network between vehicles and road infrastructures that are designed to fill the need for an extra layer of safety.<sup>1</sup> An important part of the V2I communication is based on Road Side Units (RSUs), sensors that are installed alongside roads. Together with the sensors that are installed on the vehicles, they span the V2I communication. As the resources for RSUs distribution are limited and their enhanced safety is key for V2I and the autonomous vehicle adaptation, distributing RSUs in states of a (good) SAFEZONE could enhance the safety of popular commutes efficiently. Namely, given data regarding commutes (trajectories) in an area, installing RSUs in its’ SAFEZONE states will ensure increased safety measures of a major part of the commutes, from starting point to destination, and potentially increase the trust in the system. In addition, if regulation were to prevent people from making autonomous commutes outside of the SAFEZONE, having most of the autonomous commutes confined to the SAFEZONE implies that most commutes can still be driverless.

Another useful application is automatic robotic arms that assemble products. If something unusual happened during the assembly of a product, it might result in a malfunctioning product, and in that case, the operator should be notified (anomaly detection). On the other hand, it is not really autonomic if the operator is notified too frequently. If we find a ‘safe enough’ SAFEZONE, we can make sure that we notify the operator only in the rare event the production process (trajectory) escapes it, which means that something went wrong with the product assembly. Furthermore, if the SAFEZONE is small, the manufacturer can potentially test the SAFEZONE states and verify their compliance, ensuring that the majority of products are well constructed for a significantly lower testing budget.

Finally, the SAFEZONE problem can be viewed through the lens of explainable RL, where the goal is to explain a specific policy. SAFEZONE is a new post-hoc explanation of the summarization type Alharin et al. (2020). For example, for the autonomous vehicle infrastructure design, governments could explain to their citizens the design that was chosen.

Our results include approximation algorithms for the SAFEZONE problem, which we show is NP-hard. We are interested in a good trade-off between the escape probability of the SAFEZONE and its size. Our algorithms are evaluated based on two criteria: their approximation factors (w.r.t. the escape probability bound and the optimal set size for this bound), and their trajectory sample complexity bounds (e.g., Even-Dar et al. (2002)).

**Contribution:** In Section 2 we formalize the SAFEZONE problem. In Section 3, we explore naive approaches, namely greedy algorithms that select SAFEZONES based on state distributions and trajectory sampling. In addition, we show particular cases in which their solutions are far from optimal, either in terms of high escape probability or significantly larger set size. In Section 4 we design FINDING SAFEZONE, an efficient approximation algorithm with provable guarantees. The algorithm returns a SAFEZONE which is slightly more than twice the size and twice the escape probability compared to the optimal. While the main focus of this work is the introduction of the problem and the aforementioned theoretical guarantees, we do demonstrate the problem empirically, to provide additional intuition to the readers. In Section 5, we compare the performance of the naive approaches to FINDING SAFEZONE and show that different policies might lead to completely different SAFEZONES. In Appendix A, we show that the problem is hard, even for known environment

<sup>1</sup>The ‘V2I Deployment Coalition’ is an initiative by the U.S. Department of Transportation with the vision of “An integrated national infrastructure that provides the country a connected, safe and secure transportation system taking full advantage of the progress being made in the Connected and Autonomous Vehicle arenas.” <https://transportationops.org/V2I/V2I-overview>

88 setting, namely even when the induced Markov chain is given, finding a SAFEZONE is NP-hard, even  
 89 for horizon  $H = 2$ .  
 90 For brevity, some algorithms and (full) proofs are relegated to the appendix.

## 91 1.1 Related Work

92 MDPs have been studied extensively in the context of decision making in particular by the Reinforce-  
 93 ment Learning (RL) community (see Puterman (1994) for a broad background on MDPs, and Sutton  
 94 & Barto (2018) for background on reinforcement learning).

95 **Safe RL** A related line of research is safe RL, where the goal of the learner is to find the best policy  
 96 that satisfies safety guarantees. The two main methodologies to handle such problems are: (1) altering  
 97 the objective to include the safety requirement and optimizing over it, and (2) adding additional  
 98 safety constraints to the exploration part. See Pfrommer et al. (2021); Emam et al. (2021); Xu et al.  
 99 (2021); Hendrycks et al. (2021); HasanzadeZonuzi et al. (2021); Bennett et al. (2023); Prajapat et al.  
 100 (2022) for recent works and García & Fernández (2015); Amodei et al. (2016) for surveys. In our  
 101 work, the goal is not to find the optimal policy, but rather, given a policy, finding its SAFEZONE.  
 102 The SAFEZONE is not characterized by specific requirements, and might not be unique. Moreover,  
 103 beyond the MDP, the solution very much depends on the policy.

104 **Imitation Learning.** In imitation learning, the learner observes a policy behavior and wants to  
 105 imitate it (see Hussein et al. (2017) for a survey). Similar to imitation learning, we are given access to  
 106 samples of a given policy. In contrast, rather than imitating the policy we find the policy’s SAFEZONE,  
 107 which is an important property of the policy.

108 **Approximate MDP equivalence.** Another related research line is that of finding an (almost)  
 109 equivalent minimal model for a given MDP, where the goal is that the optimal policy on the (almost)  
 110 equivalent model induces an (approximately) optimal policy in the original MDP, e.g., Givan et al.  
 111 (2003); Even-Dar & Mansour (2003). This line of works and ours differ in that we do not try to  
 112 modify the MDP (e.g., cluster similar states), but rather to find a SAFEZONE, a property that is  
 113 defined for the existing MDP and a specific policy.

114 **Explainability.** In explainability, the goal is to provide a post-hoc explanation to a specific (given)  
 115 model Molnar (2019), e.g., using decision trees Blanc et al. (2021); Moshkovitz et al. (2021),  
 116 influential examples Koh & Liang (2017), or local approximation explanations Li et al. (2020). We  
 117 focus on explainability for reinforcement learning, and specifically, we suggest a new summarization  
 118 explanation through our SAFEZONE (Amir & Amir, 2018).

## 119 2 The Safe Zone Problem

120 We model the problem using a Markov model with a finite horizon  $H > 1$ . Formally, there  
 121 is a Markov chain (MC)  $\langle \mathcal{S}, P, s_0 \rangle$  where  $\mathcal{S}$  is the set of states,  $s_0 \in \mathcal{S}$  is the initial state, and  
 122  $P : \mathcal{S} \times \mathcal{S} \rightarrow [0, 1]$  is the transition function that maps a pair of states into probability by  $P(s, s') =$   
 123  $\Pr[s_{t+1} = s' | s_t = s]$ . We assume the transition function  $P$  is induced by a policy  $\pi : \mathcal{S} \rightarrow \text{Simplex}^{\mathcal{A}}$   
 124 on an MDP  $\langle \mathcal{S}, s_0, P', \mathcal{A} \rangle$  with transition function  $P' : \mathcal{S} \times \mathcal{A} \times \mathcal{S} \rightarrow [0, 1]$  such that  $P(s, s') =$   
 125  $\sum_{a \in \mathcal{A}} P'(s, a, s') \cdot \pi(a | s)$  for all  $s, s' \in \mathcal{S}$  (though any MC can be generated this way, thus our  
 126 theoretical guarantees apply for general MCs).

127 A *trajectory*  $\tau = (s_0, \dots, s_H)$  starts in the initial state  $s_0$  and followed by a sequence of  $H$  states  
 128 generated by  $P$ , i.e.,  $\Pr[s_{i+1} = s' | s_i = s] = P(s, s')$  for all  $i \in [H]$ , where  $[H] := \{1, \dots, H\}$ . We  
 129 abuse the notation and regard a trajectory  $\tau$  both as a sequence and a set.

130 Given a subset of states  $F \subseteq \mathcal{S}$ , a trajectory  $\tau$  *escapes*  $F$  if it contains at least one state  $s \in \tau$  such  
 131 that  $s \notin F$ , i.e.,  $\tau \not\subseteq F$ . We refer to the probability that a random trajectory escapes  $F$  as *escape*  
 132 *probability* and denote it by  $\Delta(F) = \Pr_{\tau}[\tau \not\subseteq F]$ . We call  $F$  a  $\rho$ -*safe* (w.r.t. the model  $\langle \mathcal{S}, s_0, P \rangle$ )  
 133 if its escape probability,  $\Delta(F)$ , is at most  $\rho$ . Formally,

134 **Definition 2.1.** A set  $F \subseteq \mathcal{S}$  is  $\rho$ -safe if  $\Delta(F) := \Pr_{\tau}[\tau \not\subseteq F] \leq \rho$ , where  $\tau$  is a random trajectory.

A set  $F \subseteq \mathcal{S}$  is called  $(\rho, k)$ -SAFEZONE if  $F$  is  $\rho$ -safe and  $|F| \leq k$ . Given a safety parameter  $\rho \in (0, 1)$ , we denote the smallest size  $\rho$ -safe set by  $k^*(\rho)$ :

$$k^*(\rho) = \min_{F \subseteq \mathcal{S} \text{ is } \rho\text{-safe}} |F|.$$

Whenever the discussed parameter  $\rho$  is clear from the context we use  $k^*$  instead of  $k^*(\rho)$ . We remark that there might be multiple different  $(\rho, k)$ -SAFEZONE sets. The learner knows the set of states,  $\mathcal{S}$ , the initial state,  $s_0$ , and the horizon  $H$ . However, the transition function  $P$  and the minimal size of the  $\rho$ -safe set,  $k^*$ , are unknown to the learner. Instead, the learner receives information about the model from sampling trajectories from the distribution induced by  $P$ .

Given  $\rho > 0$ , the ultimate goal of the learner would have been to find a  $(\rho, k^*(\rho))$ -SAFEZONE. However, as we show in Appendix A, finding a  $(\rho, k^*(\rho))$ -SAFEZONE is NP-hard, even when the transition function  $P$  is known. This is why we loosen the objective to find a bi-criteria approximation  $(\rho', k')$ -SAFEZONE. (Bi-criteria approximations are widely studied in approximation and online algorithms Vazirani (2001); Williamson & Shmoys (2011).) In our setting, given  $\rho$  the objective is to find a set  $F$  which is  $(\rho', k')$ -SAFEZONE with minimal size  $k' \geq k^*$  and minimal escape probability  $\rho' \geq \rho$ . In addition, we are interested in minimizing the sample complexity.

Notice that the learner can efficiently verify, with high probability, whether a set  $F$  is approximately  $\rho$ -safe or not, as we formalize in the next proposition. The following proposition follows directly from Lemma C.2.

**Proposition 2.2.** *There exists an efficient algorithm such that for every set  $F \subseteq \mathcal{S}$  and parameters  $\epsilon, \lambda > 0$ , the algorithm samples  $O(\frac{1}{\epsilon^2} \ln \frac{1}{\lambda})$  random trajectories and returns  $\hat{\Delta}(F)$ , such that with probability at most  $\lambda$  we have  $|\Delta(F) - \hat{\Delta}(F)| \geq \epsilon$ .*

## 2.1 A Note on Trajectory Escaping.

The SAFEZONE problem deals with escaping trajectories. In particular, given a SAFEZONE, a trajectory escapes it, no matter if only one of its states is outside the SAFEZONE or all of them. A related, yet very different problem, is that of minimizing a subset size, such that the expected number of states outside the set is minimized. This related problem, while significantly easier (as it is solved by returning the most visited states), does not apply to the applications we described earlier. For example, consider the infrastructure design for autonomic vehicles. We want passengers to have a safe experience end-to-end. Hence the entire route must have that extra security layer provided by the RSUs. In Section 3, we show that the solution for the SAFEZONE does not necessarily overlaps with the most visited states. Furthermore, simply returning states which appeared in trajectory samples could result in a set size far from optimal.

## 2.2 Summary of Contributions

We summarize the results of all the algorithms that appear in the paper in Table 1. The bounds of GREEDY BY THRESHOLD and GREEDY AT EACH STEP requires the Markov Chain model as input, and a pre-processing step that takes  $O(|\mathcal{S}|^2 H)$  time. Additionally, the bounds for the first three algorithms (the naive approaches) require additional knowledge of  $k^*(\rho)$ . The sample complexities of SIMULATION is bounded by  $\text{poly}(k^*, \frac{1}{\rho})$ , and of FINDING SAFEZONE Algorithm is bounded by  $\text{poly}(k^*, H, \frac{1}{\epsilon}, \frac{1}{\delta})$  for some parameters  $\epsilon, \delta \in (0, 1)$ . Beyond the upper bounds, we provide each of the first three algorithms (the naive approaches) instances that show that they are tight up to a constant.

The following theorem is an informal statement of our main theorem, Theorem 4.2.

**Theorem 2.3.** *For every  $\rho, \epsilon, \delta > 0$ , with probability  $\geq 0.99$  there exists an algorithm that returns a set which is  $(2\rho + 2\epsilon, (2 + \delta)k^*)$ -SAFEZONE.*

In addition to the sample complexity, the running time of the algorithm is also bounded by  $\text{poly}(k^*, H, \frac{1}{\delta}, \frac{1}{\epsilon})$ .

We empirically evaluate the suggested algorithms on a grid-world instance (where the goal is to reach an absorbing state), showing that FINDING SAFEZONE outperforms the naive approaches. Moreover, we show that different policies have qualitatively different SAFEZONES. Finally, an informal statement of Theorem A.2 which appears in Appendix A due to space limitations.

182 **Theorem 2.4.** SAFEZONE is NP-hard.

### 183 3 Gentle Start

184 This section explains and analyzes various  
 185 naive algorithms to the SAFEZONE prob-  
 186 lem. We show that even if the transition  
 187 function is known in advance, these naive  
 188 algorithms result in outputs that are far from  
 189 optimal. To describe the algorithms, we de-  
 190 fine for each state  $s$  the probability to ap-  
 191 pear in a random trajectory and denote it  
 192 by  $p(s) = \Pr_\tau[s \in \tau] \in [0, 1]$ . Note that  
 193  $\sum_{s \in \mathcal{S}} p(s)$  is a number between 1 and  $H$   
 194 (e.g.,  $p(s_0) = 1$ ), and can be estimated effi-  
 195 ciently using dynamic programming if the  
 196 environment and policy are known and sam-  
 197 pling otherwise. To be precise, some of the  
 198 algorithms assume the probabilities  $\{p(s)\}_{s \in \mathcal{S}}$  are received as input.

Table 1: Upper bounds for safety and set size. \* Only for layered MDPs.

| Algorithm            | Safety              | Set Size          |
|----------------------|---------------------|-------------------|
| Greedy by Threshold  | $2\rho$             | $k^*H/\rho$       |
| Simulation           | $2\rho$             | $O(k^*H \ln k^*)$ |
| Greedy at Each Step* | $\rho H$            | $k^*$             |
| Finding SAFEZONE     | $2\rho + 2\epsilon$ | $(2 + \delta)k^*$ |

199 **Greedy by Threshold Algorithm.** The algorithm gets, in addition to  $\rho$ , the distribution  $p$  and a  
 200 parameter  $\beta > 0$  as input. It returns a set  $F$  that contains all states  $s$  with probability at least  $\beta$ , i.e.,  
 201  $p(s) \geq \beta$ . We formalize this idea as Algorithm 3 in Appendix B. For  $\beta = \frac{\rho}{k^*}$ , the output of the  
 202 algorithm is  $(2\rho, \frac{k^*H}{\rho}) - \text{SAFEZONE}$ . More generally, we prove the following lemma.

203 **Lemma 3.1.** For any  $\rho, \beta \in (0, 1)$ , the GREEDY BY THRESHOLD ALGORITHM returns a set that is  
 204  $(\rho + k^*\beta, \frac{H}{\beta}) - \text{SAFEZONE}$ . In particular, for  $\beta = \frac{\rho}{k^*}$ , this set is  $(2\rho, \frac{k^*H}{\rho}) - \text{SAFEZONE}$ .

205 While it is clear why there are instances for which the safety is tight, Lemma B.1 in Appendix B  
 206 shows that the set size is tight as well.

207 **Simulation Algorithm.** The algorithm samples  $O(\frac{\ln k^*}{\beta})$  random trajectories and returns a set  $F$   
 208 with all the states in these trajectories. It is formalized in Appendix B as Algorithm 4.

209 **Lemma 3.2.** Fix  $\rho, \beta \in (0, 1)$ . With probability at least 0.99, SIMULATION Algorithm returns  
 210 a set that is  $(\rho + k^*\beta, O(k^* + \frac{\rho H \ln k^*}{\beta})) - \text{SAFEZONE}$ . In particular, for  $\beta = \frac{\rho}{k^*}$ , this set is  
 211  $(2\rho, O(k^*H \ln k^*)) - \text{SAFEZONE}$ .

212 While the algorithm achieves a low escape probability, only  $2\rho$ , in Lemma B.2 in the appendix  
 213 we prove that the size of  $F$  is tight up to a constant, i.e., we show an MDP instance where  $|F| =$   
 214  $\Omega(k^*H \ln k^*)$ . The algorithms presented so far were approximately safe (i.e., low escape probability),  
 215 but the returned set size was large. Without any further assumptions, the following algorithm provides  
 216 a  $(\rho H, Hk^*) - \text{SAFEZONE}$ , thus not improving the previous algorithms. However, when considering  
 217 MDPs with a special structure it provides an optimal sized SAFEZONE, at the price of large escape  
 218 probability.

219 **Greedy at Each Step Algorithm.** For the analysis of the next algorithm, we assume the MDP is  
 220 *layered*, i.e., there are no states that appear in more than a single time step and denote  $\mathcal{S} = \bigcup_{i=1}^H \mathcal{S}_i$ .  
 221 I.e., the transitions  $P(s, s')$  are nonzero only for  $s' \in \mathcal{S}_{i+1}$  and  $s \in \mathcal{S}_i$ . The GREEDY AT EACH  
 222 STEP ALGORITHM, sometimes simply called greedy, takes at each time step  $i$  the minimal number  
 223 of states such that the sum of their probabilities is at least  $1 - \rho$ . It is formalized in Appendix B as  
 224 Algorithm 5.

225 **Lemma 3.3.** For any  $\rho \in (0, 1)$ , if the MDP is layered, GREEDY AT EACH STEP ALGORITHM  
 226 returns a set that is  $(\rho H, k^*) - \text{SAFEZONE}$ .

227 In Lemma B.3 in the appendix we provide a lower bound on the escape probability, matching up to a  
 228 constant.

229 **Weaknesses of the naive algorithms.** We showed algorithms that identify SAFEZONE with escape  
 230 probability much greater than  $\rho$  or size much greater than  $k^*$ , and instances with tight lower bounds  
 231 for each of them. This holds even when providing extra information about the model or the optimal  
 232 size of the  $\rho$ -safe set, i.e.,  $k^*$ .

## 233 4 Algorithm for Detecting Safe Zones

234 In this section, we suggest a new algorithm that builds upon and improves the added trajectory  
 235 selection of the SIMULATION Algorithm. One reason for why SIMULATION returns a large set is  
 236 that it treats every sampled trajectory identically, regardless of how many states are being added,  
 237 which could be as large as  $H$ . More precisely, fix any  $(\rho, k^*)$ -SAFEZONE set,  $F^*$ , and consider a  
 238 trajectory  $\tau$  that escapes it, i.e.,  $\tau \not\subseteq F^*$ . If  $\tau$  was sampled, its states are added to the constructed  
 239 set  $F$ , which might increase the size of  $F$  by up to  $H$  states that are not in  $F^*$ , without significantly  
 240 improving the safety. In contrast, when selecting which trajectory to add to  $F$ , we would consider the  
 241 number of states it adds to the current set. For the sake of readability, we refer to any state which is  
 242 not in the current set  $F$  as *new*, and denote by  $new_F(\tau)$  the number of new states in  $\tau$  w.r.t.  $F$ , i.e.,

$$new_F(\tau) := |\tau \setminus F|.$$

243 Note that for every  $F \subseteq \mathcal{S}$ ,  $\Pr_\tau[new_F(\tau) \neq 0] = \Delta(F)$ .

244 The new algorithm does not sample each trajectory uniformly at random, but samples from a new  
 245 distribution, which will be denoted by  $Q_F$ .

246 While favoring trajectories with higher probabilities, which we already get by the sampling process,  
 247 another key idea would guide this new distribution: To prefer trajectories that *gradually* increase the  
 248 size of  $F$ . To implement this idea, we will ensure that the probability of adding a trajectory  $\tau$  to  $F$   
 249 should be *inversely proportional* to  $new_F(\tau)$ .

Formally, the support of  $Q_F$  is the trajectories with new states, i.e.,  $X = \{\tau | new_F(\tau) \neq 0\}$ . For every  $\tau \in X$

$$Q_F(\tau) \propto \frac{\Pr[\tau]}{new_F(\tau)},$$

250 where  $\Pr[\tau]$  is the probability of trajectory  $\tau$  under the Markov Chain with dynamics  $P$ . Note that  
 251 the new distribution depends on the current set  $F$ , and changes as we modify it. Intuitively, adding  
 252 trajectories to  $F$  according to  $Q_F$  instead of adding trajectories sampled directly from the dynamics  
 253 (as we do in SIMULATION) would increase the expected ratio between the added safety and the  
 254 number of new states we add to  $F$ , thus improving the set size guarantee of the output set. We  
 255 elaborate on this in Section 4.2.

256 Our main algorithm is FINDING SAFEZONE, Algorithm 1. The algorithm receives, in addition to the  
 257 safety parameter  $\rho$ , parameters  $\epsilon, \lambda \in (0, 1)$ , and maintains a set  $F$  that is initiated to  $\{s_0\}$ . On a high  
 258 level, to implement the idea of adding trajectories to  $F$  according to  $Q_F$ , we use *rejection sampling*.  
 259 Namely, in each iteration of the while-loop we first sample a trajectory  $\tau$ , and if  $new_F(\tau) \neq 0$ , we  
 260 *accept* it with probability  $1/new_F(\tau)$ . If the trajectory is accepted, it is added to  $F$ . More precisely,  
 261 if  $new_F(\tau) \neq 0$ , we sample a Bernoulli random variable,  $accept \sim Br(1/new_F(\tau))$ . If  $accept = 1$ ,  
 262 we add  $\tau$  to  $F$ . This process of adding trajectories to  $F$  generates the desired distribution,  $Q_F$ .  
 263 Whenever a trajectory is added to  $F$ , we estimate the escape probability  $\Delta(F)$  (w.r.t. the updated set,  
 264  $F$ ).

265 The algorithm stops adding states to  $F$  and returns it as output when it becomes “safe enough”. To be  
 266 precise, let  $\hat{\Delta}(F)$  denote the result of the escape probability estimation (by sampling trajectories as  
 267 suggested in Proposition 2.2). If  $\hat{\Delta}(F) \leq 2\rho + \epsilon$ , it means that  $F$  is  $(2\rho + 2\epsilon)$ -safe with probability  
 268  $\geq 1 - \lambda_j > 1 - \lambda$ , in which case the algorithm terminates and returns  $F$  as output.

269 To implement the estimation  $\hat{\Delta}(F)$ , the algorithm calls *EstimateSafety* Subroutine. The subroutine  
 270 samples  $N_j = \Theta(\frac{1}{\epsilon^2} \ln \frac{2}{\lambda_j})$  trajectories, and returns the fraction of trajectories that escaped  $F$ .  
 271 For cases in which the transition function  $P$  is known to the learner, we provide an alternative  
 272 implementation for *EstimateSafety* which computes the exact probability  $\Delta(F)$  (see Lemma F.1 in  
 273 Appendix F).

**Algorithm 1** FINDING SAFEZONE

---

Input:  $\rho \in (0, 1)$   
Parameters:  $\epsilon, \lambda \in (0, 1)$   
 $F \leftarrow \{s_0\}, j \leftarrow 1, \hat{\Delta}(F) \leftarrow 1$   
**while**  $\hat{\Delta}(F) > 2\rho + \epsilon$  **do**  
   $\tau \leftarrow$  sample a random trajectory  
  Compute  $new_F(\tau)$   
  **if**  $new_F(\tau) \neq 0$  **then**  
    sample  $accept \sim Br(1/new_F(\tau))$   
    **if**  $accept = 1$  **then**  
       $F \leftarrow F \cup \tau$   
       $\lambda_j \leftarrow \frac{3\lambda}{2(j\pi)^2}, j \leftarrow j + 1$   
       $\hat{\Delta}(F) \leftarrow EstSafety(\epsilon, \lambda_j, F)$   
    **end if**  
  **end if**  
**end while**  
return  $F$

---

**Algorithm 2** *EstSafety* Subroutine

---

Input: subset  $F$   
Parameters:  $\epsilon, \lambda_j \in (0, 1)$   
 $\hat{\Delta}(F) \leftarrow 0$   
 $\mathcal{T} \leftarrow$  sample  $N_j = \frac{1}{2\epsilon^2} \ln \frac{2}{\lambda_j}$  trajectories  
**for**  $\tau \in \mathcal{T}$  **do**  
  **if**  $\tau \not\subseteq F$  **then**  
     $\hat{\Delta}(F) \leftarrow \hat{\Delta}(F) + \frac{1}{N_j}$   
  **end if**  
**end for**  
return  $\hat{\Delta}(F)$

---

**4.1 Algorithm Analysis**

We define the event  $\mathcal{E} = \{\forall i \mid |\hat{\Delta}(F_{i-1}) - \Delta(F_{i-1})| \leq \epsilon\}$ , which states that all our *EstimateSafety* Subroutine estimations are accurate. We show that  $\mathcal{E}$  holds with high probability using Hoeffding's inequality. In most of the analysis, we condition on  $\mathcal{E}$  to hold.

The following theorem is the central component in the proof of the main theorem that follows it.

**Theorem 4.1.** *Given  $\rho, \epsilon, \lambda \in (0, 1)$ , FINDING SAFEZONE Algorithm returns a subset  $F \subseteq \mathcal{S}$  such that:*

1. The escape probability is bounded from above by  $\Delta(F) \leq 2\rho + 2\epsilon$ , with probability  $1 - \lambda$ .
2. The expected size of  $F$  given  $\mathcal{E}$  is bounded by  $\mathbb{E}[|F| \mid \mathcal{E}] \leq 2k^*$ .
3. The sample complexity of the algorithm is bounded by  $O\left(\frac{k^*}{\lambda\epsilon^2} \ln \frac{k^*}{\lambda} + \frac{Hk^*}{\rho\lambda}\right)$ , and the running time is bounded by  $O\left(\frac{Hk^*}{\lambda\epsilon^2} \ln \frac{k^*}{\lambda} + \frac{H^2k^*}{\rho\lambda}\right)$ , with probability  $1 - \lambda$ .

To obtain the main theorem, we run FINDING SAFEZONE Algorithm several times and return the smallest output set,  $F$ , see the next section for more details.

**Theorem 4.2.** (main theorem) *Given  $\epsilon, \rho, \delta > 0$ , if we run FINDING SAFEZONE for  $\Theta(\frac{1}{\delta})$  times and return the smallest output set,  $F \subseteq \mathcal{S}$ , then with probability  $\geq 0.99$*

1. The escape probability is bounded by  $\Delta(F) \leq 2\rho + 2\epsilon$ .
2. The size of  $F$  is bounded from above by  $|F| \leq (2 + \delta)k^*$ .
3. The total sample complexity and running time are bounded by  $O(\frac{k^*}{\delta^2\epsilon^2} \ln \frac{k^*}{\delta} + \frac{Hk^*}{\rho\delta^2})$ , and  $O(\frac{Hk^*}{\delta^2\epsilon^2} \ln \frac{k^*}{\delta} + \frac{H^2k^*}{\rho\delta^2})$ , respectively.

**4.2 Proof Technique**

**Escape probability set size bounds.** To ease the presentation of the proof, we assume that  $\hat{\Delta}(F) = \Delta(F)$ . For full proofs, we refer to Appendix C. This case is interesting on its own since if the policy and transition function are known, we can compute  $\Delta(F)$  efficiently using dynamic programming (see Appendix F). As a result, event  $\mathcal{E}$  always holds. In addition, it is clear that the termination of the algorithm implies that  $\hat{\Delta}(F) = \Delta(F) \leq 2\rho$ , thus  $F$  is  $(2\rho + 2\epsilon)$ -safe. The main challenge is bounding  $|F|$ .

301 A few notations before we start. Let  $F^*$  denote a minimal  $\rho$ -safe set (of size  $k^*$ ). Consider iteration  
 302  $i$  inside the while-loop. The random variable  $G_i(F)$  is the number of states in  $F^*$  that are added  
 303 to  $F$  in iteration  $i$  and  $B_i(F)$  is the number of states added to  $F$  in iteration  $i$  that are not in  $F^*$  ( $G$   
 304 stands for *good* and  $B$  for *bad*). For ease of presentation, from here on we write  $G_i$  and  $B_i$  instead of  
 305  $G_i(F)$  and  $B_i(F)$ , respectively. Notice that the size of the output set is exactly  $\sum_i B_i + G_i$  and that  
 306  $\sum_i G_i \leq k^*$ .

The main idea of the proof technique is to show that by adding trajectories according to the new  
 distribution  $Q_F$ , we ensure that, in expectation, there are at least as many good states that are added  
 to  $F$  as bad states. Suppose the trajectory  $\tau$  was chosen to be added to  $F$  by the algorithm. If  $\tau \subseteq F^*$ ,  
 then  $G_i$  is equal to  $\text{new}_F(\tau)$  and  $B_i = 0$ . If  $\tau \not\subseteq F^*$ , then  $B_i \leq \text{new}_F(\tau)$ . Summarizing these  
 observations, we have the following bounds

$$G_i \geq \text{new}_F(\tau) \cdot \mathbb{I}[\tau \subseteq F^*] \text{ and } B_i \leq \text{new}_F(\tau) \cdot \mathbb{I}[\tau \not\subseteq F^*],$$

307 where  $\mathbb{I}[\cdot]$  is the indicator function.

308 Moreover, a direct consequence of the probability in which  $\tau$  is added to  $F$  is that for any set of  
 309 trajectories  $T$ ,

$$\begin{aligned} \mathbb{E}_{\tau \sim Q_F}[\text{new}_F(\tau) \cdot \mathbb{I}[\tau \in T]] &= \sum_{\tau \in T} Q_F(\tau) \text{new}_F(\tau) \\ &= \frac{1}{Z} \sum_{\tau \in T, \text{new}_F(\tau) \neq 0} \left( \frac{\Pr[\tau]}{\text{new}_F(\tau)} \right) \text{new}_F(\tau) \\ &= \frac{1}{Z} \Pr_{\tau}[\tau \in T \wedge \text{new}_F(\tau) \neq 0], \end{aligned} \quad (1)$$

310 where  $Z$  is the normalization factor of  $Q_F$ .

311 To bound the size of  $F$ , we want to show that the algorithm does not add too many states outside of  
 312  $F^*$ . We therefore bound  $\mathbb{E}[B_i]/\mathbb{E}[G_i]$ , where the expectations are over the trajectory  $\tau$  that is added  
 313 to  $F$  according to  $Q_F$ . Applying Equation (1) twice, once with  $T = \{\tau \mid \tau \subseteq F^*\}$  and once with  
 314  $T = \{\tau \mid \tau \not\subseteq F^*\}$ , we bound the ratio between  $B_i$  and  $G_i$  by

$$\frac{\mathbb{E}[B_i]}{\mathbb{E}[G_i]} \leq \frac{\Pr_{\tau}[\tau \not\subseteq F^* \wedge \text{new}_F(\tau) \neq 0]}{\Pr_{\tau}[\tau \subseteq F^* \wedge \text{new}_F(\tau) \neq 0]}. \quad (2)$$

315 We know that  $\Pr_{\tau}[\tau \not\subseteq F^*]$  is always smaller than  $\rho$ , so the numerator is  $\leq \rho$ . A lower bound for the  
 316 denominator is  $\Pr_{\tau}[\text{new}_F(\tau) \neq 0] - \Pr_{\tau}[\tau \not\subseteq F^*]$ . In addition, whenever the algorithm is inside the  
 317 main loop, the safety is at least  $\Pr_{\tau}[\text{new}_F(\tau) \neq 0] = \Delta(F) > 2\rho$ . Thus, the denominator is at least  
 318  $\rho$ . Hence, the RHS of (2) is less or equal to 1, thus

$$\mathbb{E}[B_i] \leq \mathbb{E}[G_i]. \quad (3)$$

This completes the proof because we know that the algorithm does not add too many states outside of  
 $F^*$ . More precisely,

$$\mathbb{E}[|F|] = \mathbb{E}\left[\sum_i B_i + G_i\right] \leq \mathbb{E}\left[2 \sum_i G_i\right] \leq 2k^*.$$

319 **Sample complexity.** To discuss the sample complexity, we drop the assumption that the MC is known  
 320 to the learner and use *EstimateSafety* Subroutine to approximate  $\Delta(F)$ . The number of calls to  
 321 *EstimateSafety* is bounded by the size of the output set,  $F$ . Hence, this part of the sample complexity  
 322 is bounded by  $|F| \cdot N_{|F|}$  and we show that is  $O(\frac{k^*}{\epsilon^2} \log k^*)$ . Another source of sampling is trajectories  
 323 sampled for purposes of potentially adding them to  $F$ . Observe that at any iteration the set  $F$  has an  
 324 escape probability of at least  $2\rho$ , and each trajectory that escapes  $F$  is accepted with a probability of  
 325 at least  $1/H$ . This implies a lower bound for the probability that a random trajectory is accepted is  
 326  $2\rho/H$ . This gives an upper bound of  $\frac{2|F|\rho}{H}$  for the expected sample complexity.

327 **Amplification.** Theorem 4.1 shows that if  $\mathcal{E}$  holds, then the set size,  $|F|$ , is bounded *in expectation*  
 328 by  $2k^*$ . As  $\Pr[\mathcal{E}] \geq 1 - \lambda$  implies, from Markov's inequality, that the size  $(2 + \delta)k^*$  with small  
 329 probability of about  $\delta + \lambda = O(\delta)$ . If we want to make sure that the actual size is at most  $(2 + \delta)k^*$   
 330 with high probability, we can repeat the process about  $\Theta(\frac{1}{\delta})$  times and take the smallest size set.



## 5 Empirical Demonstration

This section demonstrates the qualitative and quantitative performance of the described algorithms in the paper.

**The MDP.** We focus on a grid of size  $N \times N$ , for some parameter  $N$ . The agent starts off at mid-left state,  $(0, \lfloor \frac{N}{2} \rfloor)$  and wishes to reach the (absorbing) goal state at  $(N - 1, \lfloor \frac{N}{2} \rfloor)$  with a minimal number of steps. At each step, it can take one of four actions: up, down, right, and left by 1 grid square. With probability 0.9, the intended action is performed and with probability 0.1 there is a drift down. The agent stops either way after  $H = 300$  steps.

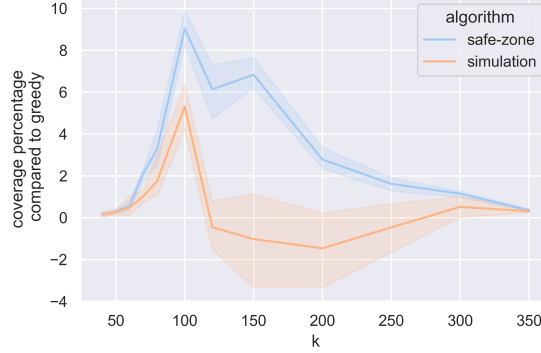

Figure 1: %Coverage: difference from GREEDY Algorithm.

### 5.1 FINDING

#### SAFEZONE vs. naive approaches

To compare the FINDING SAFEZONE

Algorithm to the naive approaches presented in Section 3 we focus on the policy that first goes to the right and when it reaches the rightmost column, it goes up. The policy is described in the appendix, Figure 6(d). We take  $N = 30$  and 2000 episodes.

We run the FINDING SAFEZONE, GREEDY, and SIMULATION algorithms, and estimate their coverage based on a test set containing 2000 random trajectories. Section 5 depicts the trajectories coverage of each algorithm minus the coverage of the GREEDY algorithm. For a figure with absolute values, we refer the reader to Figure 6(b) in the appendix. We see that the new algorithm exhibits better performance compared to its competitors. We also see that taking less than 30% of the states ( $k = 250$  out of 900 states) is enough to get coverage of more than 80% of the trajectories.

Figures 5(a),5(b) show the sets found for  $k = 60$  both by the *Finding* SAFEZONE Algorithm and GREEDY. We see that GREEDY chooses an unconnected set for this small  $k$ , leading to a coverage of 0. While the new algorithm chooses a few states which consist of several trajectories, thus leading to a coverage larger than 0.

## 6 Discussion and Open Problems

In this paper, we have introduced the SAFEZONE problem. We have shown that it is NP-hard, even when the model is known, and designed a nearly  $(2\rho, 2k^*)$  approximation algorithm for the case where the model and policy are unknown to the algorithm. Beyond improving the approximation factors (or showing that it cannot be done unless  $P = NP$ ), a natural direction for future work is the following. Given a small  $\rho > 0$  and a (known or unknown to the learner) MDP, find a policy with a small  $\rho$ -safe subset. If the value of the policy, when restricted to the SAFEZONE states, is close to the optimal value of the original MDP, restricting the policy to the SAFEZONE states generates a compact policy representation with a value close to optimal, and most trajectories are completed in the SAFEZONE.

## References

- Abel, D., Arumugam, D., Lehnert, L., & Littman, M. (2018). State abstractions for lifelong reinforcement learning. In *International Conference on Machine Learning*, (pp. 10–19). PMLR.
- Alharin, A., Doan, T.-N., & Sartipi, M. (2020). Reinforcement learning interpretation methods: A survey. *IEEE Access*, 8, 171058–171077.

379 Amir, D., & Amir, O. (2018). Highlights: Summarizing agent behavior to people. In *Proceedings*  
380 *of the 17th International Conference on Autonomous Agents and MultiAgent Systems*, (pp. 1168–  
381 1176).

382 Amodei, D., Olah, C., Steinhardt, J., Christiano, P. F., Schulman, J., & Mané, D. (2016). Concrete  
383 problems in AI safety. *CoRR*.

384 Bennett, A., Misra, D., & Kallus, N. (2023). Provable safe reinforcement learning with binary  
385 feedback. In *International Conference on Artificial Intelligence and Statistics*, (pp. 10871–10900).  
386 PMLR.

387 Blanc, G., Lange, J., & Tan, L.-Y. (2021). Provably efficient, succinct, and precise explanations.  
388 *Advances in Neural Information Processing Systems*, 34.

389 Brandes, U., Holm, E., & Karrenbauer, A. (2016). Cliques in regular graphs and the core-periphery  
390 problem in social networks. In *International Conference on Combinatorial Optimization and*  
391 *Applications*, (pp. 175–186). Springer.

392 Chandola, V., Banerjee, A., & Kumar, V. (2009). Anomaly detection: A survey. *ACM Comput. Surv.*.

393 Dong, S., Van Roy, B., & Zhou, Z. (2019). Provably efficient reinforcement learning with aggregated  
394 states. *arXiv preprint arXiv:1912.06366*.

395 Emam, Y., Glotfelter, P., Kira, Z., & Egerstedt, M. (2021). Safe model-based reinforcement learning  
396 using robust control barrier functions. *CoRR*.

397 Even-Dar, E., Mannor, S., & Mansour, Y. (2002). PAC bounds for multi-armed bandit and markov  
398 decision processes. In J. Kivinen, & R. H. Sloan (Eds.) *Computational Learning Theory, 15th*  
399 *Annual Conference on Computational Learning Theory, COLT 2002, Sydney, Australia, July 8-10,*  
400 *2002, Proceedings*.

401 Even-Dar, E., & Mansour, Y. (2003). Approximate equivalence of markov decision processes. In  
402 B. Schölkopf, & M. K. Warmuth (Eds.) *Computational Learning Theory and Kernel Machines, 16th*  
403 *Annual Conference on Computational Learning Theory and 7th Kernel Workshop, COLT/Kernel*  
404 *2003, Washington, DC, USA, August 24-27, 2003, Proceedings*.

405 García, J., & Fernández, F. (2015). A comprehensive survey on safe reinforcement learning. *J. Mach.*  
406 *Learn. Res.*, 16, 1437–1480.

407 Givan, R., Dean, T., & Greig, M. (2003). Equivalence notions and model minimization in markov  
408 decision processes. *Artificial Intelligence*.

409 HasanzadeZonuzi, A., Bura, A., Kalathil, D. M., & Shakkottai, S. (2021). Learning with safety  
410 constraints: Sample complexity of reinforcement learning for constrained mdps. In *AAAI*.

411 Hendrycks, D., Carlini, N., Schulman, J., & Steinhardt, J. (2021). Unsolved problems in ML safety.  
412 *CoRR*.

413 Hussein, A., Gaber, M. M., Elyan, E., & Jayne, C. (2017). Imitation learning: A survey of learning  
414 methods. *ACM Comput. Surv.*.

415 Koh, P. W., & Liang, P. (2017). Understanding black-box predictions via influence functions. In  
416 *International Conference on Machine Learning*, (pp. 1885–1894). PMLR.

417 Li, J., Nagarajan, V., Plumb, G., & Talwalkar, A. (2020). A learning theoretic perspective on local  
418 explainability. *arXiv preprint arXiv:2011.01205*.

419 Molnar, C. (2019). *Interpretable Machine Learning*.

420 Moshkovitz, M., Yang, Y.-Y., & Chaudhuri, K. (2021). Connecting interpretability and robustness in  
421 decision trees through separation. *arXiv preprint arXiv:2102.07048*.

422 Pfrommer, S., Gautam, T., Zhou, A., & Sojoudi, S. (2021). Safe reinforcement learning with  
423 chance-constrained model predictive control. *CoRR*.

- 424 Prajapat, M., Turchetta, M., Zeilinger, M. N., & Krause, A. (2022). Near-optimal multi-agent  
425 learning for safe coverage control. In *NeurIPS*.  
426 URL [http://papers.nips.cc/paper\\_files/paper/2022/hash/  
427 60dc26558762425a465cb0409fc3dc52-Abstract-Conference.html](http://papers.nips.cc/paper_files/paper/2022/hash/60dc26558762425a465cb0409fc3dc52-Abstract-Conference.html)
- 428 Puterman, M. L. (1994). Markov decision processes: Discrete stochastic dynamic programming. In  
429 *Wiley Series in Probability and Statistics*.
- 430 Sutton, R. S., & Barto, A. G. (2018). *Reinforcement Learning: An Introduction*. Cambridge, MA,  
431 USA: A Bradford Book.
- 432 Vazirani, V. V. (2001). *Approximation Algorithms*. Berlin, Heidelberg: Springer-Verlag.
- 433 Williamson, D. P., & Shmoys, D. B. (2011). *The Design of Approximation Algorithms*. Cambridge  
434 University Press.
- 435 Xu, W., Xu, K., Bastani, H., & Bastani, O. (2021). Safely bridging offline and online reinforcement  
436 learning. *CoRR*.
- 437 Yang, J., Chen, T., Payne, B., Guo, P., Zhang, Y., & Guo, J. (2020). Generating routes for autonomous  
438 driving in vehicle-to-infrastructure communications. *Digital Communications and Networks*.

## Supplementary Material

### A Hardness

In this section we show that SAFEZONE is NP-hard to solve, and this is why approximation is necessary. Moreover, SAFEZONE is hard even if the MC and the optimal  $\rho$ -safe size,  $k^*$  are known. Our starting point is the NP-hardness of regular cliques. The REGULARCLIQUE( $G, k_c$ ) problem gets as an input (i) a regular graph  $G$  with  $n$  nodes where each node has degree  $d$ , and (ii) an integer  $k_c$ . It returns whether  $G$  contains a clique of size  $k_c$ . Whenever  $G$  and  $k_c$  are clear from the context we simply write REGULARCLIQUE. The following fact follows, e.g., from Brandes et al. (2016).

**Fact A.1.** REGULARCLIQUE is NP-hard.

**Markov chain (random walk).** Fix a graph  $G = (V, E)$  and a starting vertex  $v_0 \in V$ . The graph induces a Markov Chain (random walk) in the following way. The states of the process correspond to the vertices  $V$  in the graph  $G$ . The transition function is defined as  $P(v|u) = \frac{1}{d} \cdot \mathbb{1}_{(u,v) \in E}$ , where  $d$  is the degree of any node. The process starts from node  $v_0$  and then proceeds according to the transition function  $P$  for  $H$  steps.

**Reduction.** To prove the hardness of SAFEZONE, we show how to solve REGULARCLIQUE given a solver to SAFEZONE. For each vertex  $v \in V$ , run an algorithm for SAFEZONE with horizon  $H = 2$ ,  $k = k_c$ , and  $\rho = 1 - \left(\frac{k_c-1}{d}\right)^2$ , and  $v$  as the starting state. If there is at least one run of the algorithm that returns YES, then the final answer is YES. Otherwise, the answer is NO. Note that this reduction is efficient.

**Theorem A.2.** For every graph  $G = (V, E)$  and an integer  $k_c$  there exists a clique of size  $k_c$  in  $G \iff$  there exists  $v \in V$  such that  $\text{SAFEZONE}(V, v_0 = v, P, k_c, \rho)$  returns YES.

Given an environment, a policy, and a SAFEZONE, one could compute exactly how much safe it is (see Appendix F for details), from which we deduce our following corollary.

**Corollary A.3.** SAFEZONE is NP-complete.

We note that for  $H = 1$ , the GREEDY AT EACH STEP Algorithm is optimal.

### B Proofs of Section 3

#### B.1 Greedy by Threshold Algorithm

A naive approach to the SAFEZONE problem is to return all states  $s \in \mathcal{S}$  with probability  $p(s) \geq \beta$ , for some parameter  $\beta > 0$ , see Algorithm 3.

---

#### Algorithm 3 Greedy by Threshold

---

Parameter:  $\beta > 0, \{p(s)\}_{s \in \mathcal{S}}$   
 return  $\{s \in \mathcal{S} : p(s) \geq \beta\}$

---

**Lemma 3.1.** For any  $\rho, \beta \in (0, 1)$ , the GREEDY BY THRESHOLD ALGORITHM returns a set that is  $(\rho + k^*\beta, \frac{H}{\beta}) - \text{SAFEZONE}$ . In particular, for  $\beta = \frac{\rho}{k^*}$ , this set is  $(2\rho, \frac{k^*H}{\rho}) - \text{SAFEZONE}$ .

*Proof.* There are at most  $\frac{H}{\beta}$  states with probability  $p(s) \geq \beta$ . Thus  $|F| \leq \frac{H}{\beta}$ .

Denote by  $F^*$  the optimal  $(\rho, k^*) - \text{SAFEZONE}$  set. By the law of total probability,

$$\Pr_{\tau}[\tau \not\subseteq F] \leq \Pr_{\tau}[\tau \not\subseteq F^*] + \Pr_{\tau}[\tau \subseteq F^* \setminus F].$$

Looking at the R.H.S of the inequality, the left term is smaller than  $\rho$  by the definition of SAFEZONE. The right term is equal to the probability to reach a state in  $F^*$  that its probability is smaller than  $\beta$ , i.e., a state in  $F^* \setminus F$ .

Using union bound, this can be bounded by  $k^*\beta$ . □

477 **Lemma B.1.** For every  $\rho \in (0, 1/2)$ ,  $H \in \mathbb{N}$ , there exists an MDP and a minimal integer  $k$  such that  
 478 the MDP has a  $(\rho, k)$ -SAFEZONE, but for  $\beta = \rho/k$  GREEDY BY THRESHOLD Algorithm returns  
 479  $F$  with escape probability  $\leq 2\rho$  and of size  $|F| = \Omega(H/\beta)$ .

480 *Proof.* Fix  $\rho \in (0, 1)$ . For ease of the presentation, we will assume that  $\frac{1-\rho}{\beta}$  is an integer (if not, it  
 481 should be rounded to the nearest integer). Define  $A$  to contain  $\frac{1-\rho}{\beta} \cdot H$  states,  $B$  to contain  $k - 1$   
 482 states, and  $\mathcal{S} = \{s_0\} \cup A \cup B$ . Consider the following MDP with states  $\mathcal{S}$  and starting state  $s_0$ . The  
 483 transition function is defined as follows:

- 484 • For every  $i \in A$ ,  $\Pr[s_{1,i}^A | s_0] = \beta$  and for every  $j \in [H - 1]$ ,  $\Pr[s_{j+1,i}^A | s_{j,i}^A] = 1$ .
- 485 • For  $s \in B$ ,  $\Pr[s | s_0] = \frac{1-\rho}{k-1}$
- 486 • For  $s \in B$ ,  $\Pr[s | s] = 1$

487 The MDP is illustrated in Figure 2. Clearly,  $\{s_0\} \cup B$  is a  $(\rho, k)$ -SAFEZONE. In addition, GREEDY  
 488 BY THRESHOLD ALGORITHM returns the set of all states, as for every state  $s \in A$  we have that  
 489  $p(s) = \beta$ ,  $p(s_0) = 1 > \rho \geq \beta$ , and for every  $s \in B$  we have that  $p(s) = \frac{1-\rho}{k-1} > \frac{\rho}{k} = \beta$ . Thus the  
 490 size of the returned set is  $\mathcal{S}$ , which is of size  $\Omega(H/\beta)$ , which completes the proof.  $\square$

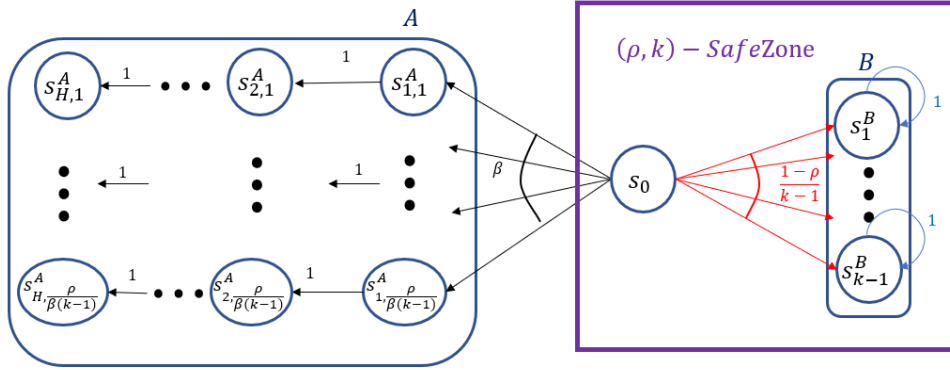

Figure 2: Lower bound for GREEDY BY THRESHOLD Algorithm.

## 491 B.2 Simulation Algorithm

---

### Algorithm 4 Simulation Algorithm

---

Input:  $m = \frac{1}{\beta} \ln \frac{k^*}{0.005}$   
 $F \leftarrow \{s_0\}$   
**for**  $i = 1 \dots m$  **do**  
   $\tau \leftarrow$  choose a random trajectory  
   $F \leftarrow F \cup \tau$   
**end for**  
**return**  $F$

---

492 **Lemma 3.2.** Fix  $\rho, \beta \in (0, 1)$ . With probability at least 0.99, SIMULATION Algorithm returns  
 493 a set that is  $\left(\rho + k^*\beta, O(k^* + \frac{\rho H \ln k^*}{\beta})\right)$ -SAFEZONE. In particular, for  $\beta = \frac{\rho}{k^*}$ , this set is  
 494  $(2\rho, O(k^* H \ln k^*))$ -SAFEZONE.

495 *Proof.* Denote by  $F^*$  the optimal  $(\rho, k^*)$  – SAFEZONE set. By the law of total expectation, we can  
 496 split  $\mathbb{E}[|F|]$  into two parts, depending on whether trajectories are entirely in  $F^*$  or not:

- 497 • Trajectories that are entirely in  $F^*$  contribute at most  $k^*$  states to  $F$ .
- 498 • A trajectory that is not contained in  $F^*$  contributes at most  $H$  states to  $F$ .

Thus,

$$\mathbb{E}[|F|] \leq k^* + \rho \cdot \left( \frac{1}{\beta} \ln \frac{k^*}{0.005} \right) \cdot H = O \left( k^* + \frac{\rho H \ln k^*}{\beta} \right).$$

499 We use Markov’s inequality to get the desired bound on  $|F|$ .

500 For the safety, we first denote the set of all states in  $F^*$  with probability at least  $\beta$  as  $\Gamma =$   
 501  $\{s \in F^* \mid p(s) \geq \beta\}$ . We will show that with probability at least 0.9995, it holds that  $\Gamma \subseteq F$ ,  
 502 which will prove our claim, similarly to Lemma 3.1.

503 For a fixed state  $s \in \Gamma$ , the probability that  $s \notin F$  is bounded by  $(1 - p(s))^{\frac{1}{\beta} \ln \frac{k^*}{0.005}} \leq e^{-\frac{\beta}{\beta} \cdot \ln \frac{k^*}{0.005}} =$   
 504  $\frac{0.005}{k^*}$ . Using union bound, the probability that there is a state  $s \in \Gamma$  which is not in  $F$  is bounded by  
 505  $k^* \cdot \frac{0.005}{k^*} = 0.005$ .

506 In other words, with probability at least 0.995,  $\Gamma \subseteq F$ , thus implementing the greedy approach  
 507 in Algorithm 3 and proving that the probability that a random trajectory escapes  $F$  is bounded by  
 508  $\rho + k^* \beta$ .  $\square$

509 **Lemma B.2.** For every  $\rho, \gamma \in (0, 1)$ ,  $H, k \in \mathbb{N}$ , and  $\beta = \frac{\rho}{k}$ , there is an integer  $r \in \mathbb{N}$  and MDP  
 510 with  $(\rho, k)$ –SAFEZONE, but with probability  $\geq 1 - \gamma$ , SIMULATION algorithm returns  $F$  of size  
 511  $\mathbb{E}[|F|] \geq kH \ln k$  with escape probability  $\Delta(F) = O(\rho)$ .

512 *Proof.* Fix  $\rho, \gamma \in (0, 1)$ . Recall that  $m = \frac{1}{\beta} \ln \frac{k^*}{0.005}$  and take  $r = \lceil \frac{m^2}{\gamma} \rceil$ . Define  $A$  to contain  $rH$   
 513 states,  $B$  to contain  $k - 1$  states, and  $\mathcal{S} = \{s_0\} \cup A \cup B$ .

514 Consider the following MDP with states  $\mathcal{S}$  and starting state  $s_0$ . The transition function is defined as  
 515 follows:

- 516 • For every  $i \in A$ ,  $\Pr[s_{1,i}^A | s_0] = \frac{\rho}{r}$  and for every  $j \in [H - 1]$ ,  $\Pr[s_{j+1,i}^A | s_{j,i}^A] = 1$ .
- 517 • For  $s \in B$ ,  $\Pr[s | s_0] = \frac{1-\rho}{k-1}$
- 518 • For  $s \in B$ ,  $\Pr[s | s] = 1$

519 The MDP is illustrated in Figure 3.

520 The set  $B \cup \{s_0\}$  is  $\rho$ –safe with  $k$  states.

521 We will show that:

- 522 • After adding  $\geq \frac{1}{\beta} \ln k = \frac{k}{\rho} \ln k$  random trajectories, with probability  $\geq 1 - \gamma$  we have that  
 523  $|F| \geq kH \ln k$ .
- 524 • After adding  $m$  random trajectories, we have that with high probability  $F^* \subseteq F$ , thus  
 525  $\Delta(F) \leq \Omega(\rho)$ .

526 To prove the first property, we claim that with probability  $\geq 1 - \gamma$ , every time we add a trajectory  $\tau$   
 527 such that  $\tau \cap A \neq \emptyset$ , we add  $H$  new states.

528 Notice that if we ignore  $s_0$ , trajectories in  $A$  are entirely unconnected, and each trajectory is chosen  
 529 randomly with probability  $\Pr[s_{1,i}^A | s_0] = \frac{\rho}{r}$ . This yields that if  $s_{1,i}^A \notin F$ , then  $s_{j,i}^A \notin F$  for every  
 530  $j \in [H]$ . As a result, every time we add a new  $s_{1,i}^A$  to  $F$ , we add  $H - 1$  more states to  $F$ . Let  $N$

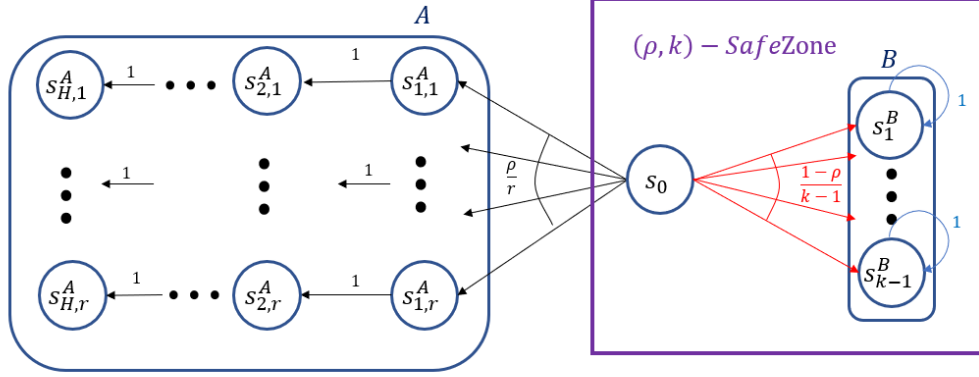

Figure 3: Lower bound for SIMULATION Algorithm.

531 denote the number of trajectories sampled with states from  $A$ . The probability that their intersection  
 532 contains only  $s_0$  is

$$\frac{r \cdot (r-1) \cdot \dots \cdot (r-N)}{r^N} \geq \left(\frac{r-N}{r}\right)^N = \left(1 - \frac{N}{r}\right)^N \geq 1 - \frac{N^2}{r} = 1 - \gamma.$$

533 From the structure of the MDP, we have that  $\mathbb{E}[N] = \rho m$ . Therefore, with probability  $\geq 1 - \gamma$ ,

$$\mathbb{E}[|F|] \geq \mathbb{E}[N] \cdot H = \rho \cdot m \cdot H \geq \rho \cdot \frac{1}{\beta} \ln k \cdot H = kH \ln k.$$

534 The second property follows from Lemma 3.2. □

### 535 B.3 Greedy at Each Step

---

#### Algorithm 5 Greedy at Each Step

---

Input:  $\rho > 0, \{p(s)\}_{s \in \mathcal{S}}$   
 $F \leftarrow \{s_0\}$   
**for**  $i = 1 \dots H$  **do**  
  Sort states in  $\mathcal{S}_i, p(s_i^1) \geq \dots \geq p(s_i^{|\mathcal{S}_i|})$   
   $j^* \leftarrow \arg \min_{j \in [|\mathcal{S}_i|]} \sum_{r=1}^j p(s_i^r) \geq 1 - \rho$   
   $F \leftarrow F \cup \{s_i^1, \dots, s_i^{j^*}\}$   
**end for**  
return  $F$

---

536 **Lemma 3.3.** For any  $\rho \in (0, 1)$ , if the MDP is layered, GREEDY AT EACH STEP ALGORITHM  
 537 returns a set that is  $(\rho H, k^*)$  - SAFEZONE.

538 *Proof.* Take a random trajectory  $\tau = (s_1, s_2, \dots)$ . For every  $s_i \in \tau$ , the probability that  $s_i \notin F$  is  
 539 bounded by  $\rho$ , thus using union bound, the probability that  $\tau$  has state  $s_i$  such that  $s_i \notin F$  is at most  
 540  $\rho H$ .

541 The construction of  $F$  guarantees that  $F$  is the minimal subset of states such that for every  $i$ , the  
 542 probability that  $s_i$  is in the subset is at least  $1 - \rho$ . Assume by contradiction that  $|F| > k^*$ . Then  
 543 there is a time step  $i$  such that  $\Pr[s_i \in F^*] < 1 - \rho$ , which is a contradiction, since  $\Pr[\tau \in F^*] \leq$   
 544  $\min_i \Pr[s_i \in F^*]$ . □

**Lemma B.3.** For any  $\rho \in (0, 1)$ , there is an MDP and an integer  $k$  such that there is a  $(\rho, k)$ -SAFEZONE, but GREEDY AT EACH STEP Algorithm returns  $F$  with escape probability  $\Delta(F) \geq \Omega(H\rho)$ .

*Proof.* Fix  $\rho \in (0, 1)$  and take  $k = 3H + 1$ .

Consider the MDP illustrated in Figure 4. The set  $\{s_0\} \cup \{s_1^i\}_i \cup \{s_2^i\}_i \cup \{s_3^i\}_i$  form a  $(\rho, 3H + 1)$ -SAFEZONE.

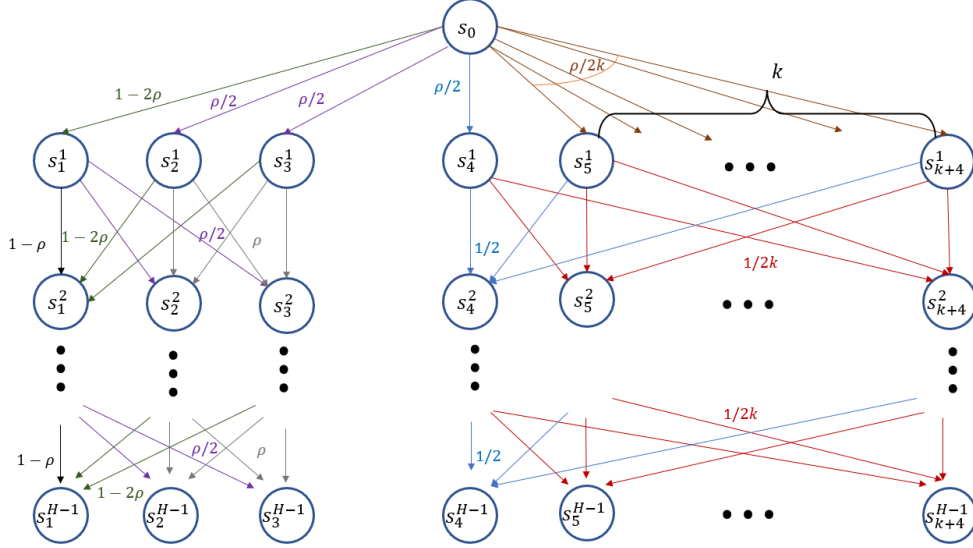

Figure 4: Lower bound for GREEDY AT EACH STEP Algorithm.

We will prove by induction that for every time  $i$ ,

- $p(s_1^i) = 1 - 2\rho$ ,
- $p(s_2^i) = p(s_3^i) = p(s_4^i) = \frac{\rho}{2}$ , and
- For every  $j \in \{5, \dots, k+4\}$ ,  $p(s_j^i) = \frac{\rho}{2k}$ .

It is easy to see that the two properties hold for  $i = 1$ .

For  $i > 1$ ,

$$p(s_1^i) = p(s_1^{i-1})(1 - \rho) + p(s_2^{i-1})\frac{\rho}{2} + p(s_3^{i-1})\frac{\rho}{2} = (1 - 2\rho)(1 - \rho) + 2(1 - 2\rho)\frac{\rho}{2} = 1 - 2\rho$$

$$p(s_2^i) = p(s_1^{i-1})\frac{\rho}{2} + p(s_2^{i-1})\rho + p(s_3^{i-1})\rho = (1 - 2\rho)\frac{\rho}{2} + \frac{\rho^2}{2} + \frac{\rho^2}{2} = \frac{\rho}{2}$$

Similarly,  $p(s_3^i) = \frac{\rho}{2}$ .

$$p(s_4^i) = \frac{1}{2}p(s_4^{i-1}) + \sum_{j=5}^{k+4} \frac{p(s_j^{i-1})}{2} = \frac{\rho}{4} + k \frac{\rho}{4k} = \frac{\rho}{2}$$

For every  $j \in \{5, \dots, k+4\}$ ,

$$p(s_j^i) = \frac{1}{2k}p(s_4^{i-1}) + \sum_{m=5}^{k+4} \frac{p(s_m^{i-1})}{2k} = \frac{\rho}{4k} + k \frac{\rho}{4k^2} = \frac{\rho}{2k}.$$

The algorithm might return  $\{s_0\} \cup \{s_1^i\}_i \cup \{s_2^i\}_i \cup \{s_4^i\}_i$ , i.e., instead of taking  $\cup_i \{s_3^i\}_i$  it takes  $\cup_i \{s_4^i\}_i$ . Finally, the observation  $\Delta(\{s_0\} \cup \{s_1^i\}_i \cup \{s_2^i\}_i \cup \{s_4^i\}_i) \geq \frac{\rho H}{4}$  completes the proof.  $\square$



## C Proofs of Section 4

For convenience, we state here Hoeffding's inequality.

**Lemma C.1.** [Hoeffding's Inequality] Let  $y_1, \dots, y_N$  be independent random variables such that  $y_i \in [a, b]$  for every  $y_i$  with probability 1. Then, for any  $\epsilon > 0$ ,

$$\Pr \left[ \left| \frac{1}{N} \sum_{i=1}^N y_i - \mathbb{E}[y_i] \right| \geq \epsilon \right] \leq 2e^{-2N\epsilon^2/(b-a)^2}.$$

### C.1 Proof of Theorem 4.1

In this section, we provide a complete proof for Theorem 4.1. Throughout the section, we define a few terms and notions. We will start with proving guarantees regarding a single iteration of the while-loop.

Recall that  $F^*$  denotes a minimal  $\rho$ -safe set (of size  $k^*$ ). If there are multiple optimal solutions, choose one arbitrarily. For the convince of analysis, we denote the values of the algorithm variables at the end of each iteration  $i$  of the while-loop by  $\tau_i, F_i, \text{accept}_i$ . Let  $j(i)$  denote the value of variable  $j$  during the  $i$ -th call to *EstimateSafety* Subroutine. In addition, let  $N_i$  denote the number of trajectories sampled for the  $j$ -th time of calling Subroutine *EstimateSafety*, i.e.,  $N_i = \frac{1}{2\epsilon^2} \ln \frac{2}{\lambda_{j(i)}}$  for  $j(i) \leq i$ .

For ease of presentation, we recall some of the definitions from the proof technique description. We say that a trajectory  $\tau$  is *good* if all the states in  $\tau$  are in  $F^*$  and *bad* if it escapes it. I.e., a trajectory is good if  $\tau \subseteq F^*$  and bad if  $\tau \not\subseteq F^*$ . Additionally, we say that a state  $s \in \mathcal{S}$  is *good* if it is in  $F^*$  and *bad* otherwise. Namely, a state  $s$  is good if  $s \in F^*$  and bad if  $s \notin F^*$ . Let  $G_i(F_{i-1})$  and  $B_i(F_{i-1})$  be the number of good and bad states added to  $F_{i-1}$  in iteration  $i$ , respectively (notice that  $G_i(F_{i-1})$  and  $B_i(F_{i-1})$  are random variables that depends on  $F_{i-1}$ ). For short, whenever it is clear from the context, we write  $G_i$  and  $B_i$  respectively.

The following lemma bounds the error in approximating the escape probability.

**Lemma C.2.** Let  $F_{i-1} \subseteq \mathcal{S}$  be a subset of states and  $\epsilon, \lambda_j > 0$  be some parameters. Let  $S_i$  be a sample of  $N_i \geq \frac{1}{2\epsilon^2} \ln \frac{2}{\lambda_{j(i)}}$  i.i.d. random trajectories. Then,

$$\Pr_{S_i} \left[ \left| \hat{\Delta}(F_{i-1}) - \Delta(F_{i-1}) \right| \geq \epsilon \right] \leq \lambda_j.$$

Also, as  $\lambda_j = \frac{3\lambda}{2(\pi j)^2}$ ,

$$\Pr \left[ \exists i \left| \hat{\Delta}(F_{i-1}) - \Delta(F_{i-1}) \right| \geq \epsilon \right] \leq \lambda/4,$$

Where the last probability is over all the samples  $S_i$  made by *EstimateSafety* Subroutine.

*Proof.* The first part follows directly from Hoeffding's inequality by taking  $y_i = \mathbb{I}[\tau \not\subseteq F]$ .

Assigning  $\lambda_j = \frac{3\lambda}{2(\pi j)^2}$  and applying union bound, we get

$$\begin{aligned} \Pr \left[ \exists i \left| \hat{\Delta}(F_{i-1}) - \Delta(F_{i-1}) \right| \geq \epsilon \right] &\leq \sum_i \Pr_{S_i} \left[ \left| \hat{\Delta}(F_{i-1}) - \Delta(F_{i-1}) \right| \geq \epsilon \right] \\ &\leq (*) \sum_{j(i)} \lambda_{j(i)} \leq \sum_{j=1}^{\infty} \lambda_j = \sum_{j=1}^{\infty} \frac{3\lambda}{2(\pi j)^2} = \frac{\lambda}{4}. \end{aligned}$$

The inequality marked by (\*) follows from the fact that  $\Delta(F)$  is estimated once for every time  $j$  increases.  $\square$

We define the event that *EstimateSafety* always provides good estimations by

$$\mathcal{E} = \{\forall i \left| \hat{\Delta}(F_{i-1}) - \Delta(F_{i-1}) \right| \leq \epsilon\}.$$

By the above, we have that  $\Pr[\mathcal{E}] \geq 1 - \lambda/4$ .

590 In the following lemma we assume that if the current escape probability is at least  $2\rho$ , then the fraction  
 591 of bad trajectories that escape  $F_{i-1}$  is bounded from above by the fraction of good trajectories that  
 592 escape  $F_{i-1}$ .

593 **Lemma C.3.** *Let  $\rho > 0$  and assume that  $\Delta(F_{i-1}) \geq 2\rho$ . Then,*

$$\Pr_{\tau}[\text{new}_{F_{i-1}}(\tau) \neq 0 \wedge \tau \not\subseteq F^*] \leq \Pr_{\tau}[\text{new}_{F_{i-1}}(\tau) \neq 0 \wedge \tau \subseteq F^*],$$

594 *where the probabilities are over random trajectories.*

595 *Proof.* To prove the lemma, we will bound the probability  $\Pr_{\tau}[\text{new}_{F_{i-1}}(\tau) \neq 0 \wedge \tau \not\subseteq F^*]$  from  
 596 above and the probability  $\Pr_{\tau}[\text{new}_{F_{i-1}}(\tau) \neq 0 \wedge \tau \subseteq F^*]$  from below. Since  $\Delta(F^*) \leq \rho$ ,

$$\Pr_{\tau}[\text{new}_{F_{i-1}}(\tau) \neq 0 \wedge \tau \not\subseteq F^*] \leq \Pr_{\tau}[\tau \not\subseteq F^*] \leq \rho. \quad (4)$$

597 The assumption  $\Delta(F_{i-1}) \geq 2\rho$  implies that

$$\begin{aligned} 2\rho \leq \Delta(F_{i-1}) &= \Pr_{\tau}[\text{new}_{F_{i-1}}(\tau) \neq 0] = \Pr_{\tau}[\text{new}_{F_{i-1}}(\tau) \neq 0 \wedge \tau \subseteq F^*] + \Pr_{\tau}[\text{new}_{F_{i-1}}(\tau) \neq 0 \wedge \tau \not\subseteq F^*] \\ &\leq \Pr_{\tau}[\text{new}_{F_{i-1}}(\tau) \neq 0 \wedge \tau \subseteq F^*] + \Pr_{\tau}[\tau \not\subseteq F^*] \leq \Pr_{\tau}[\text{new}_{F_{i-1}}(\tau) \neq 0 \wedge \tau \subseteq F^*] + \rho, \end{aligned}$$

598 hence

$$\rho \leq \Pr_{\tau}[\text{new}_{F_{i-1}}(\tau) \neq 0 \wedge \tau \subseteq F^*]. \quad (5)$$

599 Putting (4) and (5) together yields the statement.  $\square$

600 Now, as long as the algorithm is inside the while-loop (i.e., the escape probability holds  $\hat{\Delta}(F) >$   
 601  $2\rho + \epsilon$ ), it follows that  $\Delta(F) \geq 2\rho$  with high probability from Lemma C.2. Combining it with  
 602 Lemma C.3 would yield that with high probability over a random trajectory, if the trajectory escapes  
 603  $F$  then in expectation, it is at least as likely to be good as it is to be bad.

604 We move on to show the main ingredient of the proof, namely that for any iteration, with high  
 605 probability, the expected number of good states added to the current set  $F$  is larger or equal to the  
 606 expected number of bad states.

607 For every iteration  $i$  in which we sample  $\tau_i$  both  $G_i$  and  $B_i$  depends on the following:

- 608 1. The realizations of the sampled trajectory,  $\tau_i$ , and in particular on  $\text{new}_{F_{i-1}}(\tau_i)$ .
- 609 2. The probability of adding it to  $F$ , i.e.,  $1/\text{new}_{F_{i-1}}(\tau_i)$ .

610 Next, we prove Equation (3).

611 **Lemma C.4.** *Assume event  $\mathcal{E}$  holds. Thus, for all iterations  $i$  inside the while-loop we have*

$$\mathbb{E}[B_i|F_{i-1}] \leq \mathbb{E}[G_i|F_{i-1}],$$

612 *where the expectation is over the trajectory  $\tau$  that is sampled from the MC dynamics and added to*  
 613  *$F_{i-1}$  according to  $Q_{F_{i-1}}$ .*

614 *Proof.* Since event  $\mathcal{E}$  holds, we have that  $\Delta(F_{i-1}) \geq 2\rho$  as long as we do not terminate in iteration  $i$ .

615 We can use it to bound  $\mathbb{E}_{\tau}[B_i|F_{i-1}]$  by

$$\begin{aligned} \mathbb{E}_{\tau}[B_i|F_{i-1}] &\leq \sum_{h=1}^H \frac{\Pr_{\tau}[\text{new}_{F_{i-1}}(\tau) = h \wedge \tau \not\subseteq F^*]}{h} \cdot h \\ &= \Pr_{\tau}[\text{new}_{F_{i-1}}(\tau) \neq 0 \wedge \tau \not\subseteq F^*] \underbrace{\leq}_{\text{Lemma C.3}} \Pr_{\tau}[\text{new}_{F_{i-1}}(\tau) \neq 0 \wedge \tau \subseteq F^*] \\ &= \sum_{h=1}^H \frac{\Pr_{\tau}[\text{new}_{F_{i-1}}(\tau) = h \wedge \tau \subseteq F^*]}{h} \cdot h \leq \mathbb{E}_{\tau}[G_i|F_{i-1}]. \end{aligned}$$

616  $\square$

**Theorem 4.1.** Given  $\rho, \epsilon, \lambda \in (0, 1)$ , FINDING SAFEZONE Algorithm returns a subset  $F \subseteq \mathcal{S}$  such that:

1. The escape probability is bounded from above by  $\Delta(F) \leq 2\rho + 2\epsilon$ , with probability  $1 - \lambda$ .
2. The expected size of  $F$  given  $\mathcal{E}$  is bounded by  $\mathbb{E}[|F| \mid \mathcal{E}] \leq 2k^*$ .
3. The sample complexity of the algorithm is bounded by  $O\left(\frac{k^*}{\lambda\epsilon^2} \ln \frac{k^*}{\lambda} + \frac{Hk^*}{\rho\lambda}\right)$ , and the running time is bounded by  $O\left(\frac{Hk^*}{\lambda\epsilon^2} \ln \frac{k^*}{\lambda} + \frac{H^2k^*}{\rho\lambda}\right)$ , with probability  $1 - \lambda$ .

*Proof.* Assume that the event  $\mathcal{E}$  holds, and recall that

$$\Pr[\mathcal{E}] \geq 1 - \lambda/4. \quad (6)$$

We start with the first clause. Since the event  $\mathcal{E}$  holds, Lemma C.2 in particular implies that  $\Delta(F) \leq 2\rho + 2\epsilon$ , hence the first clause holds. For second clause, we will bound  $\mathbb{E}[|F| \mid \mathcal{E}]$  from above by  $2k^*$ . Since  $\mathcal{E}$  holds, we have that  $\Delta(F_{i-1}) \geq 2\rho$ , for every  $i$  inside the while-loop, thus Lemma C.4 yields

$$\mathbb{E}[B_i \mid F_{i-1}] \leq \mathbb{E}[G_i \mid F_{i-1}].$$

This implies that

$$\mathbb{E}[|F| \mid \mathcal{E}] \leq 2 \sum_i \mathbb{E}_{F_{i-1}}[\mathbb{E}[G_i \mid F_{i-1}]] \mid \mathcal{E}] \leq 2k^*, \quad (7)$$

where the last inequality follows from the definition of  $G_i$ , as  $\sum_i G_i \leq |F^*| = k^*$ .

We continue with the third clause of the theorem. Let  $M$  denote the sample complexity of the algorithm, namely  $M = M_F + M_E$  where  $M_F$  is the expected total number of trajectories sampled within the FINDING SAFEZONE Algorithm (without the samples made by *EstimateSafety* Subroutine) and  $M_E$  is the total number of trajectories sampled using *EstimateSafety*. We will bound each term separately.

Since  $\mathcal{E}$  holds, whenever we are inside the while-loop,  $\Delta(F_i) \geq 2\rho$ , which implies that it takes at most  $1/2\rho$  trajectories in expectation to sample a trajectory that escapes  $F_i$ , and such trajectory is accepted with probability at least  $1/H$ .

Thus, from Wald's identity, it follows that

$$\mathbb{E}[M_F \mid \mathcal{E}] = \frac{H}{2\rho} \cdot \mathbb{E}[|F| \mid \mathcal{E}] \leq \frac{Hk^*}{\rho}.$$

From Markov's inequality on the above inequality, with probability at least  $1 - \frac{\lambda}{4}$ ,

$$\Pr\left[M_F \geq \frac{4Hk^*}{\rho\lambda} \mid \mathcal{E}\right] \leq \frac{\lambda}{4}. \quad (8)$$

Moving on to bound  $M_E$ . Since  $\mathcal{E}$  holds, it follows from Equation (7) and Markov's inequality that

$$\Pr\left[|F| \geq \frac{8k^*}{\lambda} \mid \mathcal{E}\right] = \Pr\left[|F| \geq 2k^* \cdot \frac{4}{\lambda} \mid \mathcal{E}\right] = \Pr\left[|F| \geq \mathbb{E}[|F| \mid \mathcal{E}] \cdot \frac{4}{\lambda} \mid \mathcal{E}\right] \leq \frac{\lambda}{4}. \quad (9)$$

If  $|F| \leq \frac{8k^*}{\lambda}$ , the number of calls for Subroutine *EstimateSafety* is also bounded by  $8\pi k^*/\lambda$  (we only call *EstimateSafety* after we added states to  $F$ ). It also implies that  $\frac{3\lambda^3}{2(8\pi k^*)^2} \leq \lambda_j$  for every  $j \geq 1$ .

Thus, if  $|F| \leq \frac{8k^*}{\lambda}$ ,

$$\begin{aligned} M_E &= \sum_{j=1}^{|F|} N_j \leq \sum_j^{\frac{8k^*}{\lambda}} \frac{1}{2\epsilon^2} \ln \frac{2}{\lambda_j} \leq \sum_j^{\frac{8k^*}{\lambda}} \frac{1}{2\epsilon^2} \ln \frac{2}{\frac{3\lambda^3}{2(8\pi k^*)^2}} \leq \sum_j^{\frac{8k^*}{\lambda}} \frac{1}{2\epsilon^2} \ln \frac{86(\pi k^*)^2}{\lambda^3} \\ &= \frac{8k^*}{2\lambda\epsilon^2} \ln \frac{86(\pi k^*)^2}{\lambda^3} = \frac{4k^*}{\lambda\epsilon^2} \ln \frac{86(\pi k^*)^2}{\lambda^3} \end{aligned}$$

644 Combining the above with Equation (9), we get

$$\Pr \left[ M_E > \frac{4k^*}{\lambda\epsilon^2} \ln \frac{86(\pi k^*)^2}{\lambda^3} \mid \mathcal{E} \right] \leq \frac{\lambda}{4} \quad (10)$$

645 As  $M = M_F + M_E$ , union bound over Equation (6), Equation (8) and Equation (10) implies that  
 646 with probability  $\geq 1 - 3\lambda/4 > 1 - \lambda$ ,

$$M = O \left( \frac{k^*}{\lambda\epsilon^2} \ln \frac{k^*}{\lambda} + \frac{Hk^*}{\rho\lambda} \right) \quad (11)$$

647 For each trajectory we sample we run in time  $O(H)$ , e.g., by using a lookup table for maintaining  
 648 the current set  $F$ . Consequently, if the event in Equation (11) holds then the running time of the  
 649 algorithm is bounded by

$$O \left( \frac{Hk^*}{\lambda\epsilon^2} \ln \frac{k^*}{\lambda} + \frac{H^2k^*}{\rho\lambda} \right).$$

650 Overall, all the clauses in the lemma hold with probability  $\geq 1 - \lambda$ .

651 □

## 652 C.2 Proof of Theorem 4.2

653 **Theorem 4.2.** (main theorem) Given  $\epsilon, \rho, \delta > 0$ , if we run FINDING SAFEZONE for  $\Theta(\frac{1}{\delta})$  times and  
 654 return the smallest output set,  $F \subseteq \mathcal{S}$ , then with probability  $\geq 0.99$

- 655 1. The escape probability is bounded by  $\Delta(F) \leq 2\rho + 2\epsilon$ .
- 656 2. The size of  $F$  is bounded from above by  $|F| \leq (2 + \delta)k^*$ .
- 657 3. The total sample complexity and running time are bounded by  $O(\frac{k^*}{\delta^2\epsilon^2} \ln \frac{k^*}{\delta} + \frac{Hk^*}{\rho\delta^2})$ , and  
 658  $O(\frac{Hk^*}{\delta^2\epsilon^2} \ln \frac{k^*}{\delta} + \frac{H^2k^*}{\rho\delta^2})$ , respectively.

659 *Proof.* Assume we run FINDING SAFEZONE Algorithm for  $m = \frac{2\ln 300}{\delta}$  times and denote each  
 660 algorithm output by  $F^i$ . Return the smallest set  $F = \operatorname{argmin}_{F^i} |F^i|$ .

661 It follows from Theorem 4.1 that for every  $\lambda \in (0, 1)$ , each  $F^i$  is of expected size  $\mathbb{E}[|F^i|] \leq 2k^*$ , and  
 662 is  $(2\rho + 2\epsilon)$ -safe with probability  $\geq 1 - \lambda$ . Choosing  $\lambda = \frac{0.01}{3m}$  implies

$$\Pr[\Delta(F) > 2\rho + 2\epsilon] \leq \frac{0.01}{3}. \quad (12)$$

663 In addition, from Markov's inequality it follows that for every  $\delta > 0$ ,

$$\begin{aligned} \Pr[|F^i| > (2 + \delta)k^*] &\leq \Pr[|F^i| > (2 + \delta)k^* \mid \mathcal{E}] + \Pr[\mathcal{E}] \\ &\leq \frac{2k^*}{(2 + \delta)k^*} + \lambda \\ &= 1 - \frac{\delta/2}{1 + \delta/2} + \lambda \\ &= 1 - \frac{\delta/2 - \lambda - \lambda\delta/2}{1 + \delta/2} \end{aligned}$$

664 From the independence of the algorithm runs, for  $m = \frac{2\ln 300}{\delta}$ ,

$$\begin{aligned} \Pr[|F| > (2 + \delta)k^*] &\leq \Pr[\forall i : (|F^i| > (2 + \delta)k^*)] \\ &\leq \prod_{i \in [m]} \Pr[|F^i| > (2 + \delta)k^*] \\ &\leq \left( 1 - \frac{\delta/2 - \lambda - \lambda\delta/2}{1 + \delta/2} \right)^m \\ &\leq e^{-m(\frac{\delta/2 - \lambda - \lambda\delta/2}{1 + \delta/2})} \leq \frac{0.01}{3}. \end{aligned}$$

665 Hence

$$\Pr[|F| > (2 + \delta)k^*] \leq \frac{0.01}{3}. \quad (13)$$

As for the sample complexity, let  $M_i$  denote the (random) sample complexity of the  $i$ -th run, and let us denote

$$\bar{M} = \frac{4k^*}{\lambda\epsilon^2} \ln \frac{86(\pi k^*)^2}{\lambda^3} + \frac{4Hk^*}{\rho\lambda}.$$

666 From Theorem 4.1,  $M_i > \bar{M}$  with probability  $< \lambda$ .

667 By taking the union bound on the sample complexity bound per one run, we get

$$\Pr[\exists i : M_i > \bar{M}] \leq \sum_{i \in [m]} \Pr[M_i > \bar{M}] \leq m \cdot \lambda = \frac{0.01}{3}.$$

668 Where the last inequality follows from Theorem 4.1, and  $\lambda = \frac{0.01}{3m}$ .

669 Assigning  $m = \frac{2 \ln 300}{\delta}$  and  $\lambda = \frac{0.01}{3m} = \frac{0.01\delta}{6 \ln 300}$ , we get that with probability  $\geq 1 - \frac{0.01}{3}$ ,

$$\sum_{i=1}^m M_i = O\left(\frac{mk^*}{\lambda\epsilon^2} \ln \frac{k^*}{\lambda} + \frac{mHk^*}{\rho\lambda}\right) = O\left(\frac{k^*}{\delta^2\epsilon^2} \ln \frac{k^*}{\delta} + \frac{Hk^*}{\rho\delta^2}\right) \quad (14)$$

670 Since the algorithm runs in time  $O(H)$  for every trajectory sampled, if the sample complexity is  
671 bounded by the above term, then the total running time is bounded by  $O\left(\frac{Hk^*}{\delta^2\epsilon^2} \ln \frac{k^*}{\delta} + \frac{Hk^*}{\rho\delta^2}\right)$ .

672 Finally, from union bound over Equation (12), Equation (13) and Equation (14) all the theorem  
673 properties hold with probability  $\geq 0.99$ .  $\square$

## 674 D Proofs of Section A

675 **Theorem A.2.** *For every graph  $G = (V, E)$  and an integer  $k_c$  there exists a clique of size  $k_c$  in  $G$*   
676  *$\iff$  there exists  $v \in V$  such that  $\text{SAFEZONE}(V, v_0 = v, P, k_c, \rho)$  returns YES.*

677 *Proof.* ( $\implies$ ) If there is a clique of size  $k_c$ , then we can take the corresponding  $k$  states. The  
678 probability to remain in this subset is at least  $\left(\frac{k-1}{d}\right)^2$  (remember that  $H = 2$ ). Thus, an exact solver  
679 for SAFEZONE must return YES.

680 ( $\impliedby$ ) Suppose there is no clique of size  $k$ . Assume by contradiction that the reduction (algorithm)  
681 returns YES. Let  $s_0$  be a vertex which was the starting state from the running instance which the YES  
682 came from and let  $\hat{F}$  denote the output of SAFEZONE. We will show that the probability to remain  
683 in any subset of size  $k$  is smaller than  $\left(\frac{k-1}{d}\right)^2$ .

684 Since there is no clique of size  $k$  in  $G$ , we know that  $\hat{F}$  is not a clique. It therefore follows that there  
685 exists at least two vertexes,  $s_a, s_b \in V$  such that  $(s_a, s_b) \notin E$ .

686 We will now bound the probability of escape from state  $s_0$  by exhaustion.

687 1. If  $s_0 \neq s_a$ , then

$$\begin{aligned} & \Pr[\text{escape from } s_0] \geq \Pr[t = 1 : (s_0, s'), s' \notin \hat{F}] \\ & + \Pr[t = 1 : (s_0, s), s \neq s_a] \cdot \Pr[t = 2 : (s, s'), s' \notin \hat{F} | t = 1 : (s_0, s), s \neq s_a] \\ & + \Pr[t = 1 : (s_0, s_a)] \cdot \Pr[t = 2 : (s_a, s'), s' \notin \hat{F} | t = 1 : (s_0, s_a)] \\ & = \frac{d - (k - 1)}{d} + \frac{k - 2}{d} \cdot \frac{d - (k - 1)}{d} + \frac{1}{d} \cdot \frac{d - (k - 2)}{d} \\ & = 1 - \frac{k - 1}{d} + \frac{k - 2}{d} - \frac{(k - 2)(k - 1)}{d^2} + \frac{1}{d} - \frac{k - 2}{d^2} = \end{aligned}$$

$$1 - \frac{k-2}{d^2}(k-1+1) = 1 - \frac{k(k-2)}{d^2}$$

Hence

$$\Pr[\textit{staying}] \leq \frac{k(k-2)}{d^2} < \frac{(k-1)^2}{d^2}.$$

2. If  $s_0 = s_a$ , then

$$\begin{aligned} \Pr[\textit{escape from } s_0] &\geq \Pr[t = 1 : (s_0, s'), s' \notin \hat{F}] \\ &+ \Pr[t = 1 : (s_0, s), s \in \hat{F}] \cdot \Pr[t = 2 : (s, s'), s' \notin \hat{F} | t = 1 : (s_0, s), s \in \hat{F}] \\ &= \frac{d - (k-2)}{d} + \frac{k-2}{d} \cdot \frac{d - (k-1)}{d} \\ &= 1 - \frac{k-2}{d} + \frac{k-2}{d} - \frac{(k-2)(k-1)}{d^2} \\ &= 1 - \frac{(k-2)(k-1)}{d^2} \end{aligned}$$

Hence

$$\Pr[\textit{staying}] \leq \frac{(k-2)(k-1)}{d^2} < \frac{(k-1)^2}{d^2}.$$

□

## E Additional Figures for Section 5

### E.1 Comparing SAFEZONE of two policies

In this section, we empirically explore the SAFEZONE of two different policies within the same MDP. The first policy, described in the previous section, first goes right and then to the middle, and the second policy first goes to the middle and then goes right. See Figure 6 in the appendix. These seemingly similar policies induce very different SAFEZONES as can be seen in Figure 8 which depicts the number of visits in each state. It shows that the second policy requires fewer states to achieve the same level of safety, even though in terms of minimizing the number of steps to get to the goal state it is outperformed by the first policy (intuitively, the second policy has more fail attempts to go up in expectation since the lowest row of the grid cannot get worst). In Figure 7 we see that already with 14% of the states, all three algorithms achieve trajectory coverage of more than 85%.

Figure 6 depicts the two policies discussed in the paper when  $N = 7$ .

Figure 7 depicts coverage percentage for the different algorithms discussed in the paper when applied to the second policy.

Figure 6(c) depicts the number of total visits at each state using the described policy.

Figure 8 shows the visits of the policies described in the main paper for  $N = 30$ . It is immediately clear that the SAFEZONE of the two policies are fundamentally different. As mentioned, this affects their SAFEZONE sizes. Namely, when trying to go right from a current state in the lowest row it is impossible to get to a square that is lower than that, and the first policy takes advantage of this. In contrast, the second policy keeps trying to go up from the lowest row, which implies that in expectation it goes down more times compared to the first.

## F Exact Computation

In this section, we assume that the transition function is known to the algorithm and show how to compute  $\Delta(F)$ .

Given a Markov Chain  $\langle \mathcal{S}, P, s_0 \rangle$  and a set  $F \subseteq \mathcal{S}$  we create a new Markov Chain  $\langle \mathcal{S}', P', s_0 \rangle$  as follows. We add a new state  $s_{\text{sink}} \notin \mathcal{S}$ , and set  $\mathcal{S}' = F \cup \{s_{\text{sink}}\}$ . For each transition from a state  $s \in F$  to a state  $s' \notin F$  we modify and make the transition in  $P'$  to the sink  $s_{\text{sink}}$ . In  $P'$ , when we

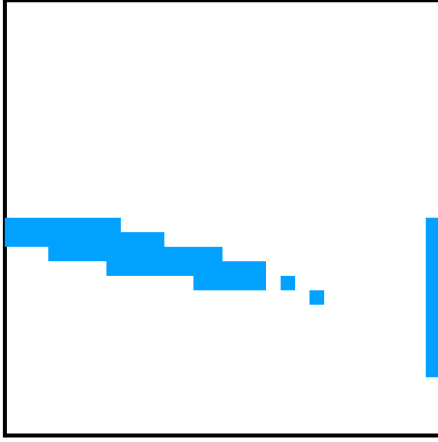

(a) Set chosen by GREEDY AT EACH STEP Algorithm.

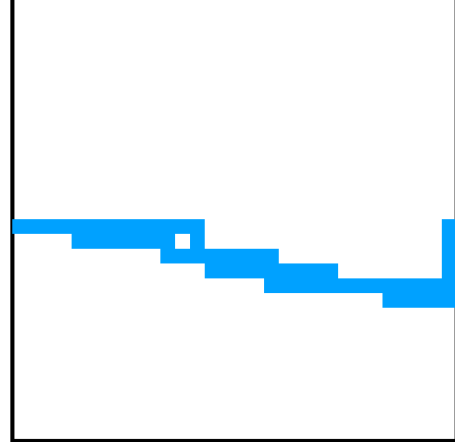

(b) Set chosen by SAFEZONE Algorithm.

Figure 5: Empirical results regarding Coverage of the different algorithms, FINDING SAFEZONES and state visit frequency.

728 are in  $s_{sink}$  we always stay in  $s_{sink}$ . More formally: (1) if  $s, s' \in F$  then  $P'(s'|s) = P(s'|s)$ , (2) we  
 729 set  $P'(s_{sink}|s) = \sum_{s' \notin F} P(s'|s)$  and (3)  $P'(s_{sink}|s_{sink}) = 1$  and  $P'(s|s_{sink}) = 0$  for  $s \neq s_{sink}$ .

730 Now we claim that  $\Delta(F) = \Pr_{P'}[s_H = s_{sink}]$ , since any trajectory that reaches a state not in  $F$  will  
 731 reach the sink in  $P'$  and stay there. We can compute  $\Pr_{P'}[s_H = s_{sink}]$  using standard dynamics  
 732 programming.

733 The running time of constructing  $\langle \mathcal{S}', P', s_0 \rangle$  is  $O(|\mathcal{S}|^2)$ . Computing the probability of  $\Pr_{P'}[s_H =$   
 734  $s_{sink}]$  takes  $O(H|\mathcal{S}|^2)$ . Therefore we have established the following.

735 **Lemma F.1.** *Given a Markov chain  $\langle \mathcal{S}, P, s_0 \rangle$  and a set  $F \subseteq \mathcal{S}$  we can compute  $\Delta(F)$  in time*  
 736  *$O(|\mathcal{S}|^2 H)$ .*

737 Note that the above lemma implements an exact version of the *EstimateSafety* Subroutine.

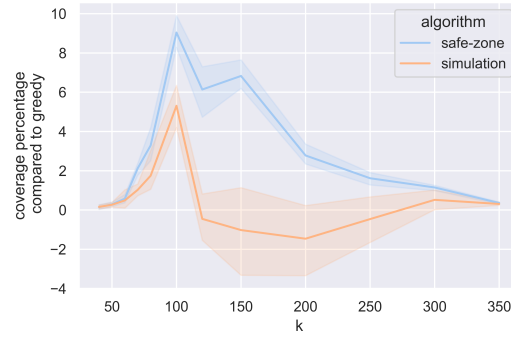

(a) %Coverage: difference from GREEDY Algorithm.

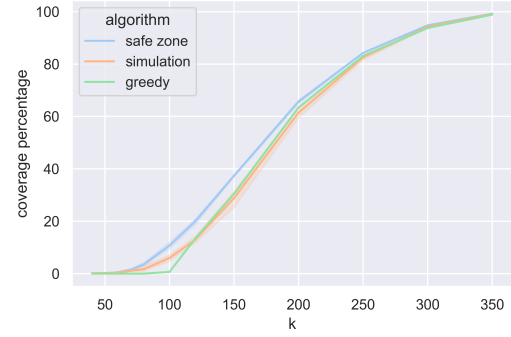

(b) %Coverage: absolute values.

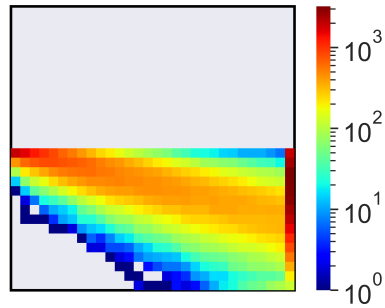

(c) Total number of visits at each state from 2000 episodes. Zero visits in grey.



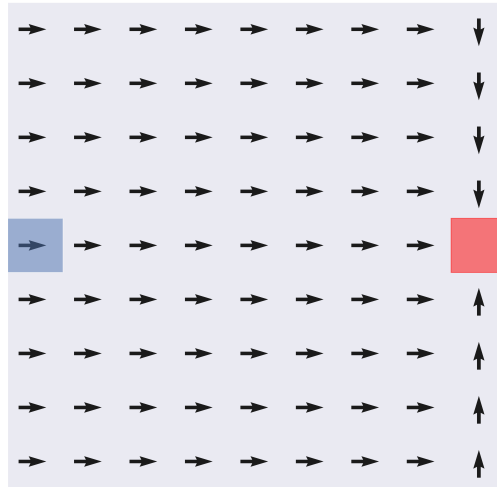

(d) Go right and then to the goal state.

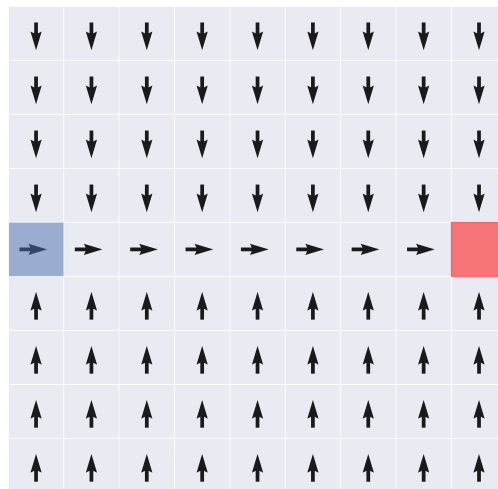

(e) Go to the middle and then right.

Figure 6: Two policies for the same MDP with  $N = 7$ . Starting state,  $s_0$ , in blue, and the goal state in red.

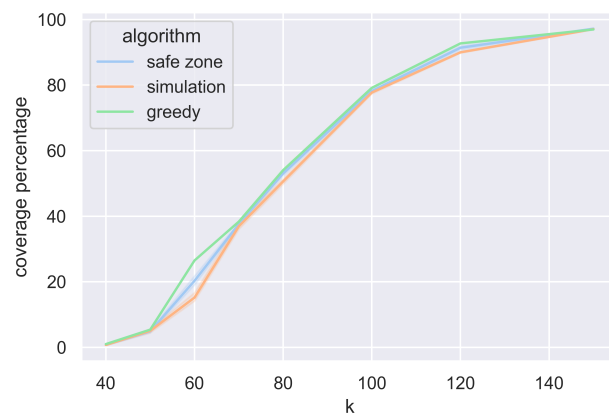

Figure 7: SAFEZONE coverage for the second policy.

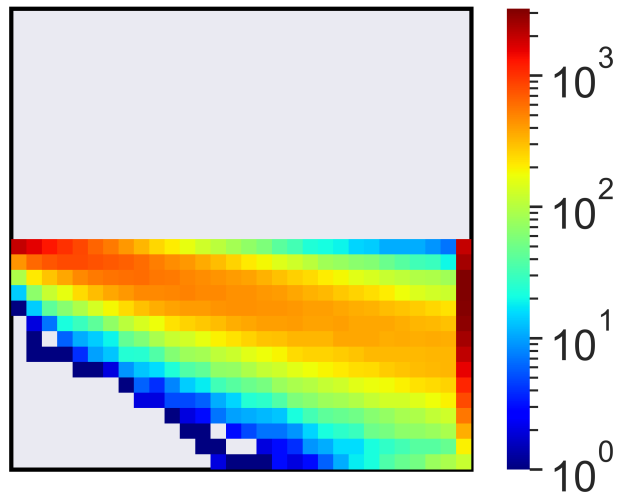

(a) Number of visits at each state for policy “Go right and then to the middle”

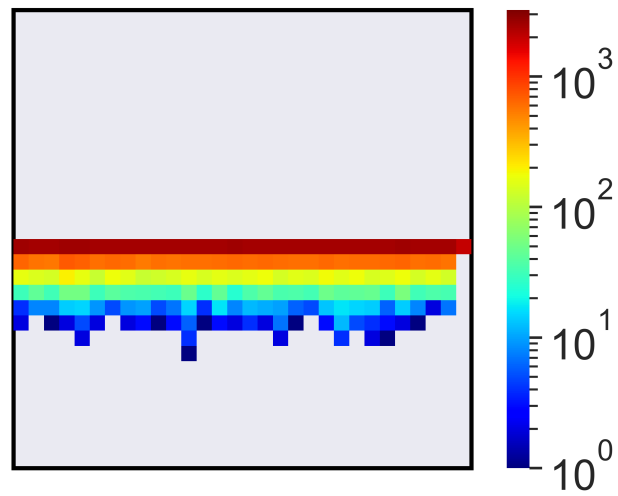

(b) Number of visits at each state for policy “Go to the middle and then right”

Figure 8: Total number of visits for the two policies.
